# Supplementary material for: Task-specific roles of local interneurons for inter- and intraglomerular signaling in the insect antennal lobe
Source: eLife. 2021 Sep 23;10:e65217. doi: 10.7554/eLife.65217 (PMC8460249; doi:10.7554/eLife.65217)
Supplement: Figure 2—source data 1. [file elife-65217-fig2-data1.xlsx]

## Sheet: Figure 2
Figure 2
Figure 2 B: Area under the curve (AUC) given in arbitrary units (AU), of the first three seconds after stimulus onset of bleach corrected, relative fluorescence changes.
	LN I #24, Table 1
	Odorant stimulus was hexanol
	Blank	Trial 1	Trial 2	Trial 3
Glomerulus 1	0.006984	0.1041	0.08052	0.08202
Glomerulus 2	0.00798	0.06907	0.05294	0.0552
Glomerulus 3	0.005919	0.08309	0.06657	0.07049
Figure 2 D: Area under the curve (AUC) given in arbitrary units (AU), of the first three seconds after stimulus onset of bleach corrected, relative fluorescence changes.
	LN II #1, Table 4, Glomeruli 1, 4, 10
	Odorant stimulus was hexanol
	Blank	Trial 1	Trial 2	Trial 3
Glomerulus 1	0.003479	0.03194	0.03604	0.03619	(LNII #1 Glomerulus 1)
Glomerulus 2	0.004396	0.01467	0.02046	0.01929	(LNII #1 Glomerulus 4)
Glomerulus 3	0.004143	0.03323	0.04069	0.04019	(LNII #1 Glomerulus 10)
