# Supplementary material for: Task-specific roles of local interneurons for inter- and intraglomerular signaling in the insect antennal lobe
Source: eLife. 2021 Sep 23;10:e65217. doi: 10.7554/eLife.65217 (PMC8460249; doi:10.7554/eLife.65217)
Supplement: Figure 3—source data 1. [file elife-65217-fig3-data1.xlsx]

## Sheet: Figure 3
Figure 3
Figure 3 A- D and supplement 1: LN I #1
Figure 3 C: Glomerular tuning curves see Source Data of LN I #1, Table1 and 2
Figure 3 D: Heatmap of correlations between glomerular tuning curves see Source Data of LN I #1, Table 3
Figure 3 E: boxplot of mean correlation coefftients from LN I #1, 3-4, 6-19
LNI ID	mean	SD	SEM	n (pairs of glomeruli)
#1	0.9939	0.006076	0.0004408	190
#3	0.9586	0.04193	0.003827	120
#4	0.9409	0.05745	0.007072	66
#6	0.9924	0.08351	0.006751	153
#7	0.9692	0.03792	0.003975	91
#8	0.9351	0.04816	0.006494	55
#9	0.9679	0.05386	0.003544	231
#10	0.9701	0.02366	0.00216	120
#11	0.9848	0.01259	0.00108	136
#12	0.9691	0.02003	0.001382	210
#13	0.7553	0.1177	0.01074	120
#14	0.9771	0.01607	0.001467	120
#15	0.9566	0.03188	0.002577	153
#16	0.9667	0.01864	0.001426	171
#17	0.9498	0.03368	0.002324	210
#18	0.9596	0.02733	0.002865	91
Figure 3 F:Heatmaps of correlations between glomerular tuning curves from LN I #7, 8, 12, 14, 15, 18
