# Supplementary material for: Task-specific roles of local interneurons for inter- and intraglomerular signaling in the insect antennal lobe
Source: eLife. 2021 Sep 23;10:e65217. doi: 10.7554/eLife.65217 (PMC8460249; doi:10.7554/eLife.65217)
Supplement: Figure 4—source data 1. [file elife-65217-fig4-data1.xlsx]

## Sheet: Figure 4
Figure 4
Figure 4 A-C and supplement 1: LN I #1
Figure 4 B, supplement 1: Glomerular tuning curves see Source DATA of LNI #1 Table 4,5
Figure 4 C: Heatmap of correlations between glomerular tuning curves of hyperpolarized neuron see Source DATA of LN I #1, Table 6
Figure 4 D: Heatmap of correlations between glomerular tuning curves of QX-314 treated neuron see Source DATA of LN I #19
Figure 4 E: Kruskall-Wallis test	P value = 0,0011		ctrl	hyperpolarized	QX-314
		Mean	0.9529	0.7473	0.7423
		SD	0.05519	0.1907	0.2561
		SEM	0.0138	0.07786	0.1145
		N	16	6	5
	Dunn's multiple comparisons test	Mean rank difference	Adjusted P Value
	ctrl vs hyperpolarized	11.52	0.0073
	ctrl vs QX-314	11.49	0.0142
	hyperpolarized vs QX-314	-0.03333	>0,9999
ctrl	LNI ID	mean	SD	SEM	n (pairs of glomeruli)
	#1	0.9939	0.006076	0.0004408	190
	#3	0.9586	0.04193	0.003827	120
	#4	0.9409	0.05745	0.007072	66
	#6	0.9924	0.08351	0.006751	153
	#7	0.9692	0.03792	0.003975	91
	#8	0.9351	0.04816	0.006494	55
	#9	0.9679	0.05386	0.003544	231
	#10	0.9701	0.02366	0.00216	120
	#11	0.9848	0.01259	0.00108	136
	#12	0.9691	0.02003	0.001382	210
	#13	0.7553	0.1177	0.01074	120
	#14	0.9771	0.01607	0.001467	120
	#15	0.9566	0.03188	0.002577	153
	#16	0.9667	0.01864	0.001426	171
	#17	0.9498	0.03368	0.002324	210
	#18	0.9596	0.02733	0.002865	91
hyperpolarized	#1	0.6786	0.1822	0.01322	190
	#2	0.8222	0.161	0.01231	171
	#3	0.4119	0.3353	0.03061	120
	#4	0.8696	0.07964	0.009803	66
	#5	0.7442	0.141	0.01376	105
	#6	0.9572	0.03547	0.002867	153
treated with QX-3314	#20	0.6732	0.2169	0.0267	66
	#21	0.9546	0.04445	0.006626	45
	#22	0.8581	0.08643	0.0144	36
	#23	0.9006	0.06023	0.008979	45
	#24	0.3252	0.2236	0.02041	120
