# Supplementary material for: Task-specific roles of local interneurons for inter- and intraglomerular signaling in the insect antennal lobe
Source: eLife. 2021 Sep 23;10:e65217. doi: 10.7554/eLife.65217 (PMC8460249; doi:10.7554/eLife.65217)
Supplement: Figure 5—source data 1. [file elife-65217-fig5-data1.xlsx]

## Sheet: Figure 5
Figure 5
Figure 5 A-D and supplement 1 A: LN II #2
Figure 5 C, supplement 1 A: Glomerular tuning curves see Source DATA of LNII #2 Table 1,2
Figure 5 D: Heatmap of correlations between glomerular tuning curves see Source DATA of LN II #2, Table 3
Figure 5 E-H and supplement 1 B: LN II #3
Figure 5 G, supplement 1 B: Glomerular tuning curves see Source DATA of LNII #3 Table 1,2
Figure 5 H: Heatmap of correlations between glomerular tuning curves see Source DATA of LN II #3, Table 3
Figure 5 I: Kruskall-Wallis test	P value < 0,001		types IIa2+IIb	type IIa1	type I
		Mean	0.5121	0.6676	0.9529
		SD	0.2282	0.1366	0.05519
		SEM	0.06588	0.05578	0.0138
		N	12	6	16
	Dunn's multiple comparisons test	Mean rank difference	Adjusted P Value
	types Ia2+IIb vs. type IIa1	3.917	>0,99
	types Ia2+IIb vs. type I	17.83	<0,001
	type Ia1 vs. type I	-13.92	0.01
	LNII ID	mean	SD	SEM	n (pairs of glomeruli)
types IIa2+IIb	#2	0.2811	0.2633	0.0152	300
	#4	0.816	0.1132	0.009709	136
	#5	0.8511	0.1198	0.01357	78
	#7	0.7425	0.1911	0.01319	210
	#8	0.6586	0.1587	0.01549	105
	#10	0.587	0.2327	0.03469	45
	#11	0.5234	0.2502	0.01815	190
	#14	0.5666	0.2703	0.04506	36
	#15	0.3609	0.2709	0.02643	105
	#16	0.3025	0.2674	0.02804	91
	#17	0.2487	0.2609	0.02237	136
	#18	0.2073	0.2314	0.0262	78
types IIa1	#1	0.7582	0.1566	0.01528	105
	#3	0.8578	0.06586	0.007457	78
	#6	0.6921	0.1923	0.03171	36
	#9	0.6719	0.2402	0.0206	136
	#12	0.526	0.2462	0.04104	36
	#13	0.4994	0.2631	0.02127	153
type I	LNI ID	mean	SD	SEM	n (pairs of glomeruli)
	#1	0.9939	0.006076	0.0004408	190
	#3	0.9586	0.04193	0.003827	120
	#4	0.9409	0.05745	0.007072	66
	#6	0.9924	0.08351	0.006751	153
	#7	0.9692	0.03792	0.003975	91
	#8	0.9351	0.04816	0.006494	55
	#9	0.9679	0.05386	0.003544	231
	#10	0.9701	0.02366	0.00216	120
	#11	0.9848	0.01259	0.00108	136
	#12	0.9691	0.02003	0.001382	210
	#13	0.7553	0.1177	0.01074	120
	#14	0.9771	0.01607	0.001467	120
	#15	0.9566	0.03188	0.002577	153
	#16	0.9667	0.01864	0.001426	171
	#17	0.9498	0.03368	0.002324	210
	#18	0.9596	0.02733	0.002865	91
Figure 5 J:Heatmaps of correlations between glomerular tuning curves	upper row: LN II # 5, 4, 1, 7, 6, 9, 8, 10
	lower row: LN II # 14, 12, 11, 13, 15, 16, 17, 18
