# Supplementary material for: Task-specific roles of local interneurons for inter- and intraglomerular signaling in the insect antennal lobe
Source: eLife. 2021 Sep 23;10:e65217. doi: 10.7554/eLife.65217 (PMC8460249; doi:10.7554/eLife.65217)
Supplement: Source data 1. [file elife-65217-supp1.xlsx]

## Sheet: LNI#1
LNI#1_160323E3
TABLE 1: Glomerular tuning curves - Area under the curve (AUC) given in arbitrary units (AU), of the first three seconds after stimulus onset of bleach corrected, relative fluorescence changes.
	Glomerulus 1	Glomerulus 2	Glomerulus 3	Glomerulus 4	Glomerulus 5	Glomerulus 6	Glomerulus 7	Glomerulus 8	Glomerulus 9	Glomerulus 10	Glomerulus 11	Glomerulus 12	Glomerulus 13	Glomerulus 14	Glomerulus 15	Glomerulus 16	Glomerulus 17	Glomerulus 18	Glomerulus 19	Glomerulus 20
Blank	0.004854	0.005424	0.008593	0.005464	0.004696	0.007860	0.008302	0.005758	0.006933	0.006361	0.006569	0.006466	0.004738	0.005370	0.005924	0.005745	0.004978	0.005049	0.005805	0.007824
Hexanol	0.141200	0.082480	0.187000	0.210500	0.187300	0.181100	0.222000	0.219000	0.223600	0.169500	0.126200	0.091010	0.167000	0.221400	0.238700	0.219400	0.235400	0.175200	0.163800	0.121100
Geraniol	0.116300	0.068510	0.151000	0.181200	0.160500	0.153500	0.192200	0.187400	0.184200	0.143400	0.107300	0.079820	0.133400	0.181900	0.207400	0.188600	0.189800	0.143900	0.128400	0.097990
Eugenol	0.109500	0.061600	0.139400	0.161900	0.146100	0.146500	0.176000	0.161700	0.167400	0.135100	0.097850	0.068550	0.129800	0.161700	0.189100	0.176000	0.179400	0.135700	0.122800	0.096270
Citronellal	0.169500	0.096900	0.213100	0.254800	0.227400	0.215400	0.271100	0.253900	0.257900	0.198700	0.151700	0.109600	0.194000	0.256700	0.293100	0.260000	0.276400	0.215800	0.187100	0.137300
Citral	0.076510	0.047620	0.099870	0.115900	0.104900	0.099080	0.123100	0.122500	0.116500	0.090870	0.067860	0.049040	0.086540	0.118900	0.135200	0.117400	0.119000	0.100700	0.083120	0.064540
Ionone	0.090120	0.052750	0.122200	0.134400	0.118000	0.114800	0.142000	0.138300	0.150000	0.111700	0.081130	0.055720	0.103600	0.140100	0.154000	0.141300	0.148300	0.111600	0.098060	0.071220
Isoamylacetate	0.196300	0.113300	0.258000	0.285100	0.254800	0.245900	0.305200	0.290500	0.302900	0.232800	0.168800	0.121300	0.220500	0.285800	0.330500	0.298500	0.309900	0.244300	0.217900	0.161500
Benzaldehyde	0.046710	0.027560	0.057320	0.064270	0.060120	0.061970	0.072310	0.075420	0.070870	0.058610	0.043140	0.033780	0.056440	0.072770	0.081300	0.072600	0.073480	0.060010	0.052710	0.045810
Pyrrolidine	0.007377	0.005322	0.008260	0.004965	0.005559	0.007007	0.008058	0.006216	0.006567	0.010390	0.006460	0.006495	0.005342	0.005967	0.006683	0.007147	0.011320	0.006029	0.005858	0.005168
TABLE 2: Glomerular tuning curves - AUC, normalized to maximum in each individual glomerulus [%].
	Glomerulus 1	Glomerulus 2	Glomerulus 3	Glomerulus 4	Glomerulus 5	Glomerulus 6	Glomerulus 7	Glomerulus 8	Glomerulus 9	Glomerulus 10	Glomerulus 11	Glomerulus 12	Glomerulus 13	Glomerulus 14	Glomerulus 15	Glomerulus 16	Glomerulus 17	Glomerulus 18	Glomerulus 19	Glomerulus 20
Blank	0	0	0	0	0	0	0	0	0	0	0	0	0	0	0	0	0	0	0	0
Hexanol	71.219	71.4302	71.5325	73.3225	73.0112	72.7777	71.9769	74.8895	73.2065	72.0455	73.7411	73.6228	75.2042	77.0353	71.7169	72.9808	75.5675	71.1182	74.4926	73.7109
Geraniol	58.2128	58.4801	57.0982	62.8446	62.2957	61.183	61.9398	63.7918	59.8942	60.5192	62.0911	63.8783	59.6314	62.9498	62.0736	62.4601	60.6129	58.0357	57.8019	58.6728
Eugenol	54.6608	52.0746	52.4472	55.9427	56.5381	58.2423	56.4834	54.7661	54.2179	56.8537	56.2661	54.0641	57.9629	55.7465	56.4355	58.1561	57.2022	54.6083	55.1616	57.5536
Citronellal	86.0013	84.7974	81.9973	89.1645	89.0446	87.187	88.5146	87.1463	84.7956	84.9408	89.4595	89.8114	87.7179	89.6231	88.4773	86.8491	89.0136	88.0878	85.4782	84.2526
Citral	37.4288	39.1153	36.5976	39.4928	40.0649	38.3213	38.6658	40.9992	37.02	37.3209	37.7801	37.0744	37.9131	40.4843	39.8292	38.1394	37.3938	39.9794	36.453	36.9062
Ionone	44.5379	43.8707	45.5508	46.1085	45.3028	44.9252	45.0316	46.5481	48.3388	46.5198	45.9598	42.8915	45.8199	48.0441	45.6214	46.3032	47.0028	44.5352	43.497	41.253
Isoamylacetate	100	100	100	100	100	100	100	100	100	100	100	100	100	100	100	100	100	100	100	100
Benzaldehyde	21.8631	20.5199	19.5371	21.0295	22.1604	22.7315	21.5589	24.465	21.6027	23.0742	22.5425	23.7856	23.9625	24.0345	23.2229	22.8365	22.4654	22.9721	22.1151	24.7182
Pyrrolidine	1.31787	-0.094553	-0.133517	-0.178446	0.345056	-0.358343	-0.0821831	0.160847	-0.123662	1.77929	-0.0671881	0.0252538	0.279938	0.212887	0.233844	0.478899	2.07988	0.409612	0.0249888	-1.72831
TABLE 3: Spearman correlations r between pairs of glomerular tuning curves (columns in table 2).
	Glomerulus 1	Glomerulus 2	Glomerulus 3	Glomerulus 4	Glomerulus 5	Glomerulus 6	Glomerulus 7	Glomerulus 8	Glomerulus 9	Glomerulus 10	Glomerulus 11	Glomerulus 12	Glomerulus 13	Glomerulus 14	Glomerulus 15	Glomerulus 16	Glomerulus 17	Glomerulus 18	Glomerulus 19	Glomerulus 20
Glomerulus 1		0.987879	0.987879	0.987879	1	0.987879	0.987879	1	0.987879	1	0.987879	1	1	1	1	1	1	1	1	0.987879
Glomerulus 2	0.987879		1	1	0.987879	1	1	0.987879	1	0.987879	1	0.987879	0.987879	0.987879	0.987879	0.987879	0.987879	0.987879	0.987879	1
Glomerulus 3	0.987879	1		1	0.987879	1	1	0.987879	1	0.987879	1	0.987879	0.987879	0.987879	0.987879	0.987879	0.987879	0.987879	0.987879	1
Glomerulus 4	0.987879	1	1		0.987879	1	1	0.987879	1	0.987879	1	0.987879	0.987879	0.987879	0.987879	0.987879	0.987879	0.987879	0.987879	1
Glomerulus 5	1	0.987879	0.987879	0.987879		0.987879	0.987879	1	0.987879	1	0.987879	1	1	1	1	1	1	1	1	0.987879
Glomerulus 6	0.987879	1	1	1	0.987879		1	0.987879	1	0.987879	1	0.987879	0.987879	0.987879	0.987879	0.987879	0.987879	0.987879	0.987879	1
Glomerulus 7	0.987879	1	1	1	0.987879	1		0.987879	1	0.987879	1	0.987879	0.987879	0.987879	0.987879	0.987879	0.987879	0.987879	0.987879	1
Glomerulus 8	1	0.987879	0.987879	0.987879	1	0.987879	0.987879		0.987879	1	0.987879	1	1	1	1	1	1	1	1	0.987879
Glomerulus 9	0.987879	1	1	1	0.987879	1	1	0.987879		0.987879	1	0.987879	0.987879	0.987879	0.987879	0.987879	0.987879	0.987879	0.987879	1
Glomerulus 10	1	0.987879	0.987879	0.987879	1	0.987879	0.987879	1	0.987879		0.987879	1	1	1	1	1	1	1	1	0.987879
Glomerulus 11	0.987879	1	1	1	0.987879	1	1	0.987879	1	0.987879		0.987879	0.987879	0.987879	0.987879	0.987879	0.987879	0.987879	0.987879	1
Glomerulus 12	1	0.987879	0.987879	0.987879	1	0.987879	0.987879	1	0.987879	1	0.987879		1	1	1	1	1	1	1	0.987879
Glomerulus 13	1	0.987879	0.987879	0.987879	1	0.987879	0.987879	1	0.987879	1	0.987879	1		1	1	1	1	1	1	0.987879
Glomerulus 14	1	0.987879	0.987879	0.987879	1	0.987879	0.987879	1	0.987879	1	0.987879	1	1		1	1	1	1	1	0.987879
Glomerulus 15	1	0.987879	0.987879	0.987879	1	0.987879	0.987879	1	0.987879	1	0.987879	1	1	1		1	1	1	1	0.987879
Glomerulus 16	1	0.987879	0.987879	0.987879	1	0.987879	0.987879	1	0.987879	1	0.987879	1	1	1	1		1	1	1	0.987879
Glomerulus 17	1	0.987879	0.987879	0.987879	1	0.987879	0.987879	1	0.987879	1	0.987879	1	1	1	1	1		1	1	0.987879
Glomerulus 18	1	0.987879	0.987879	0.987879	1	0.987879	0.987879	1	0.987879	1	0.987879	1	1	1	1	1	1		1	0.987879
Glomerulus 19	1	0.987879	0.987879	0.987879	1	0.987879	0.987879	1	0.987879	1	0.987879	1	1	1	1	1	1	1		0.987879
Glomerulus 20	0.987879	1	1	1	0.987879	1	1	0.987879	1	0.987879	1	0.987879	0.987879	0.987879	0.987879	0.987879	0.987879	0.987879	0.987879
TABLE 4: Hyperpolarized neuron. Glomerular tuning curves - AUC of the first three seconds after stimulus onset of bleach corrected, relative fluorescence changes.
	Glomerulus 1	Glomerulus 2	Glomerulus 3	Glomerulus 4	Glomerulus 5	Glomerulus 6	Glomerulus 7	Glomerulus 8	Glomerulus 9	Glomerulus 10	Glomerulus 11	Glomerulus 12	Glomerulus 13	Glomerulus 14	Glomerulus 15	Glomerulus 16	Glomerulus 17	Glomerulus 18	Glomerulus 19	Glomerulus 20
Blank	0.005064	0.007018	0.006997	0.01024	0.00504	0.006305	0.00727	0.009321	0.008727	0.01036	0.01003	0.008319	0.01308	0.006623	0.009516	0.005191	0.006294	0.00704	0.009331	0.008479
Hexanol	0.01375	0.01405	0.009286	0.01839	0.01416	0.01653	0.01371	0.01409	0.01586	0.01181	0.01005	0.007608	0.007646	0.01312	0.007638	0.01543	0.01664	0.01284	0.01171	0.0104
Geraniol	0.01624	0.01107	0.009331	0.0113	0.02258	0.02419	0.01996	0.02089	0.02762	0.01348	0.01312	0.01366	0.01625	0.01655	0.01029	0.02847	0.01937	0.01447	0.01532	0.008949
Eugenol	0.007264	0.01253	0.009024	0.01214	0.0105	0.006434	0.008021	0.00894	0.008715	0.006531	0.006936	0.007038	0.005971	0.005396	0.006332	0.009857	0.007472	0.01149	0.01232	0.006832
Citronellal	0.01003	0.009892	0.007388	0.01469	0.0141	0.01486	0.0166	0.01663	0.01881	0.01384	0.01196	0.01185	0.008342	0.01377	0.0134	0.01717	0.009423	0.01254	0.00837	0.009309
Citral	0.009699	0.006329	0.004548	0.01046	0.007042	0.009785	0.008881	0.009906	0.01013	0.01061	0.006676	0.00688	0.006676	0.006676	0.008293	0.007078	0.006836	0.009052	0.008182	0.006502
Ionone	0.01398	0.005296	0.005384	0.008872	0.009623	0.0093	0.009231	0.01136	0.01105	0.006035	0.006469	0.00673	0.006487	0.005869	0.005547	0.01347	0.006723	0.006418	0.006725	0.005713
Isoamylacetate	0.01113	0.008522	0.008134	0.01346	0.0114	0.01376	0.01386	0.01252	0.0137	0.009022	0.01151	0.007082	0.005909	0.008832	0.01009	0.01436	0.01365	0.009696	0.007687	0.01031
Benzaldehyde	0.007489	0.005185	0.00627	0.008776	0.007322	0.005511	0.01071	0.009412	0.01232	0.007541	0.007218	0.008168	0.007258	0.007282	0.006484	0.01086	0.008619	0.01056	0.008086	0.007359
Pyrrolidine	0.006741	0.006054	0.005716	0.008489	0.006474	0.006102	0.00742	0.007801	0.009529	0.007322	0.008339	0.008023	0.007507	0.006053	0.007176	0.007325	0.006501	0.006564	0.005968	0.006996
TABLE 5: Hyperpolarized neuron. Glomerular tuning curves - AUC, normalized to maximum in each individual glomerulus [%].
	Glomerulus 1	Glomerulus 2	Glomerulus 3	Glomerulus 4	Glomerulus 5	Glomerulus 6	Glomerulus 7	Glomerulus 8	Glomerulus 9	Glomerulus 10	Glomerulus 11	Glomerulus 12	Glomerulus 13	Glomerulus 14	Glomerulus 15	Glomerulus 16	Glomerulus 17	Glomerulus 18	Glomerulus 19	Glomerulus 20
Blank	0	0	0	0	0	0	0	0	0	0	0	0	0	0	0	0	0	0	0	0
Hexanol	77.7201	100	98.072	100	51.9954	57.1708	50.7486	41.2222	37.7547	41.6667	0.647249	0	0	65.4478	0	43.9838	79.1221	78.0619	39.7228	100
Geraniol	100	57.6223	100	13.0061	100	100	100	100	100	89.6552	100	100	100	100	19.9279	100	100	100	100	24.4664
Eugenol	19.685	78.3845	86.8466	23.3129	31.1288	0.721275	5.91805	0	0	0	0	0	0	0	0	20.0438	9.00887	59.8923	49.9082	0
Citronellal	44.4345	40.8703	16.7524	54.6012	51.6534	47.8334	73.5225	63.1775	53.369	100	62.4595	66.1112	0	71.9956	100	51.4584	23.9293	74.0242	0	43.2067
Citral	41.4728	0	0	2.69939	11.4139	19.4576	12.695	5.05662	7.42603	7.18391	0	0	0	0.533897	0	8.10602	4.145	27.0794	0	0
Ionone	79.7781	0	0	0	26.1288	16.7459	15.4531	17.6247	12.2956	0	0	0	0	0	0	35.5642	3.28082	0	0	0
Isoamylacetate	54.277	21.3879	48.7147	39.5092	36.26	41.683	51.9307	27.6515	26.3219	0	47.8964	0	0	22.2524	14.7786	39.3874	56.2557	35.747	0	95.3149
Benzaldehyde	21.6983	0	0	0	13.0103	0	27.108	0.786585	19.0176	0	0	0	0	6.63846	0	24.3524	17.7807	47.3755	0	0
Pyrrolidine	15.0054	0	0	0	8.1756	0	1.18203	0	4.24496	0	0	0	0	0	0	9.16706	1.58305	0	0	0
TABLE 6: Hyperpolarized neuron. Spearman correlations r between pairs of glomerular tuning curves (columns in table 5).
	Glomerulus 1	Glomerulus 2	Glomerulus 3	Glomerulus 4	Glomerulus 5	Glomerulus 6	Glomerulus 7	Glomerulus 8	Glomerulus 9	Glomerulus 10	Glomerulus 11	Glomerulus 12	Glomerulus 13	Glomerulus 14	Glomerulus 15	Glomerulus 16	Glomerulus 17	Glomerulus 18	Glomerulus 19	Glomerulus 20
Glomerulus 1		0.4073	0.536602	0.418955	0.793939	0.828283	0.806061	0.877367	0.796356	0.512092	0.648649	0.467099	0.522233	0.637812	0.46977	0.818182	0.709091	0.509241	0.365377	0.58037
Glomerulus 2	0.4073		0.944828	0.860478	0.833996	0.687215	0.510741	0.490868	0.447449	0.50985	0.619103	0.378318	0.309492	0.5403	0.373853	0.640043	0.743484	0.844292	0.803386	0.691939
Glomerulus 3	0.536602	0.944828		0.780434	0.885716	0.765753	0.627113	0.595586	0.55769	0.50985	0.742924	0.498273	0.557086	0.640356	0.501122	0.717624	0.833996	0.857382	0.851112	0.71379
Glomerulus 4	0.418955	0.860478	0.780434		0.781632	0.772291	0.606546	0.614035	0.548808	0.619934	0.697425	0.330212	0.0598684	0.654839	0.515461	0.625305	0.744113	0.74064	0.438526	0.852409
Glomerulus 5	0.793939	0.833996	0.885716	0.781632		0.889638	0.878788	0.852825	0.826752	0.655477	0.846658	0.622799	0.522233	0.806644	0.64873	0.939394	0.927273	0.877367	0.64873	0.792035
Glomerulus 6	0.828283	0.687215	0.765753	0.772291	0.889638		0.828283	0.925466	0.818496	0.808726	0.857111	0.630488	0.528681	0.822933	0.656739	0.816012	0.828283	0.73913	0.505765	0.801814
Glomerulus 7	0.806061	0.510741	0.627113	0.606546	0.878788	0.828283		0.938721	0.96657	0.669133	0.887625	0.700649	0.522233	0.925452	0.797863	0.939394	0.90303	0.754658	0.305723	0.751068
Glomerulus 8	0.877367	0.490868	0.595586	0.614035	0.852825	0.925466	0.938721		0.953887	0.787989	0.88476	0.709299	0.528681	0.892566	0.747324	0.901908	0.816012	0.677019	0.2944	0.774165
Glomerulus 9	0.796356	0.447449	0.55769	0.548808	0.826752	0.818496	0.96657	0.953887		0.732808	0.87663	0.702782	0.523823	0.940813	0.740457	0.924016	0.857147	0.713877	0.254298	0.767051
Glomerulus 10	0.512092	0.50985	0.50985	0.619934	0.655477	0.808726	0.669133	0.787989	0.732808		0.726923	0.769862	0.457604	0.803096	0.613251	0.634994	0.61451	0.711955	0.352829	0.580769
Glomerulus 11	0.648649	0.619103	0.742924	0.697425	0.846658	0.857111	0.887625	0.88476	0.87663	0.726923		0.789352	0.588348	0.901722	0.898874	0.87397	0.833002	0.732692	0.386432	0.846154
Glomerulus 12	0.467099	0.378318	0.498273	0.330212	0.622799	0.630488	0.700649	0.709299	0.702782	0.769862	0.789352		0.745356	0.722897	0.840759	0.700649	0.544949	0.630488	0.383131	0.380058
Glomerulus 13	0.522233	0.309492	0.557086	0.0598684	0.522233	0.528681	0.522233	0.528681	0.523823	0.457604	0.588348	0.745356		0.538816	0.499745	0.522233	0.522233	0.528681	0.642529	0.196116
Glomerulus 14	0.637812	0.5403	0.640356	0.654839	0.806644	0.822933	0.925452	0.892566	0.940813	0.803096	0.901722	0.722897	0.538816		0.761651	0.831656	0.90044	0.822933	0.338512	0.789006
Glomerulus 15	0.46977	0.373853	0.501122	0.515461	0.64873	0.656739	0.797863	0.747324	0.740457	0.613251	0.898874	0.840759	0.499745	0.761651		0.73821	0.618903	0.53596	0.137615	0.613251
Glomerulus 16	0.818182	0.640043	0.717624	0.625305	0.939394	0.816012	0.939394	0.901908	0.924016	0.634994	0.87397	0.700649	0.522233	0.831656	0.73821		0.866667	0.766929	0.439943	0.764723
Glomerulus 17	0.709091	0.743484	0.833996	0.744113	0.927273	0.828283	0.90303	0.816012	0.857147	0.61451	0.833002	0.544949	0.522233	0.90044	0.618903	0.866667		0.901908	0.574163	0.805691
Glomerulus 18	0.509241	0.844292	0.857382	0.74064	0.877367	0.73913	0.754658	0.677019	0.713877	0.711955	0.732692	0.630488	0.528681	0.822933	0.53596	0.766929	0.901908		0.732227	0.649745
Glomerulus 19	0.365377	0.803386	0.851112	0.438526	0.64873	0.505765	0.305723	0.2944	0.254298	0.352829	0.386432	0.383131	0.642529	0.338512	0.137615	0.439943	0.574163	0.732227		0.285624
Glomerulus 20	0.58037	0.691939	0.71379	0.852409	0.792035	0.801814	0.751068	0.774165	0.767051	0.580769	0.846154	0.380058	0.196116	0.789006	0.613251	0.764723	0.805691	0.649745	0.285624

## Sheet: LNI#2
LNI#2_150528E1
TABLE 1: Hyperpolarized neuron. Glomerular tuning curves - Area under the curve (AUC) given in arbitrary units (AU), of the first three seconds after stimulus onset of bleach corrected, relative fluorescence changes.
	Glomerulus 1	Glomerulus 2	Glomerulus 3	Glomerulus 4	Glomerulus 5	Glomerulus 6	Glomerulus 7	Glomerulus 8	Glomerulus 9	Glomerulus 10	Glomerulus 11	Glomerulus 12	Glomerulus 13	Glomerulus 14	Glomerulus 15	Glomerulus 16	Glomerulus 17	Glomerulus 18	Glomerulus 19
Blank	0.006317	0.006361	0.006831	0.007788	0.008191	0.007522	0.008381	0.007404	0.008901	0.006189	0.006306	0.007644	0.006561	0.007669	0.006859	0.0101	0.006015	0.006885	0.006383
Hexanol	0.01555	0.03428	0.01115	0.0124	0.009659	0.01082	0.01146	0.0116	0.01779	0.01167	0.007973	0.01554	0.01247	0.01084	0.01338	0.01071	0.01086	0.009138	0.01174
Citronellal	0.01896	0.01365	0.012	0.01516	0.01195	0.01364	0.01832	0.01264	0.01365	0.01671	0.009601	0.0117	0.0182	0.01883	0.019	0.01663	0.01609	0.01182	0.009112
Citral	0.05518	0.07134	0.03289	0.02445	0.02739	0.03115	0.03399	0.0271	0.02336	0.02874	0.02069	0.01907	0.02808	0.03003	0.03578	0.02435	0.03334	0.01767	0.03281
Geraniol	0.01981	0.01814	0.009196	0.006904	0.01068	0.01117	0.01046	0.009479	0.009956	0.008332	0.006629	0.008858	0.008017	0.006324	0.01304	0.009707	0.0086	0.01048	0.007596
Eugenol	0.01776	0.009127	0.01889	0.01247	0.01685	0.02412	0.01823	0.01902	0.01437	0.02008	0.01073	0.01515	0.01795	0.01069	0.01516	0.01238	0.01791	0.01585	0.02132
TABLE 2: Hyperpolarized neuron. Glomerular tuning curves - AUC, normalized to maximum in each individual glomerulus [%].
	Glomerulus 1	Glomerulus 2	Glomerulus 3	Glomerulus 4	Glomerulus 5	Glomerulus 6	Glomerulus 7	Glomerulus 8	Glomerulus 9	Glomerulus 10	Glomerulus 11	Glomerulus 12	Glomerulus 13	Glomerulus 14	Glomerulus 15	Glomerulus 16	Glomerulus 17	Glomerulus 18	Glomerulus 19
Blank	0	0	0	0	0	0	0	0	0	0	0	0	0	0	0	0	0	0	0
Hexanol	18.8957	42.9662	16.5739	27.6798	7.64623	13.958	12.0231	21.3038	61.4773	24.3049	11.5893	69.1055	27.4595	14.1809	22.5476	4.2807	17.731	20.8901	20.2709
Citronellal	25.8744	11.2175	19.8358	44.2444	19.5791	25.893	38.8106	26.5841	32.8446	46.6543	22.9074	35.498	54.0871	49.9128	41.9799	45.8246	36.871	45.758	10.3266
Citral	100	100	100	100	100	100	100	100	100	100	100	100	100	100	100	100	100	100	100
Geraniol	27.6139	18.1274	9.07556	0	12.9642	15.4393	8.11824	10.5351	7.29649	9.5029	2.24555	10.6249	6.76611	0	21.372	0	9.4602	33.3333	4.59
Eugenol	23.4185	4.25676	46.2758	28.0999	45.1013	70.2472	38.4591	58.9764	37.8242	61.5982	30.7564	65.6923	52.9253	13.5101	28.7023	16	43.5316	83.1247	56.5217
TABLE 3: Hyperpolarized neuron. Spearman correlations r between pairs of glomerular tuning curves (columns in table 2).
	Glomerulus 1	Glomerulus 2	Glomerulus 3	Glomerulus 4	Glomerulus 5	Glomerulus 6	Glomerulus 7	Glomerulus 8	Glomerulus 9	Glomerulus 10	Glomerulus 11	Glomerulus 12	Glomerulus 13	Glomerulus 14	Glomerulus 15	Glomerulus 16	Glomerulus 17	Glomerulus 18	Glomerulus 19
Glomerulus 1		0.657143	0.6	0.550782	0.771429	0.771429	0.657143	0.6	0.428571	0.6	0.6	0.428571	0.657143	0.492805	0.657143	0.550782	0.6	0.771429	0.485714
Glomerulus 2	0.657143		0.485714	0.463817	0.428571	0.428571	0.542857	0.485714	0.771429	0.485714	0.485714	0.771429	0.542857	0.637748	0.542857	0.463817	0.485714	0.428571	0.6
Glomerulus 3	0.6	0.485714		0.927634	0.942857	0.942857	0.942857	1	0.828571	1	1	0.828571	0.942857	0.811679	0.942857	0.927634	1	0.942857	0.942857
Glomerulus 4	0.550782	0.463817	0.927634		0.840668	0.840668	0.985611	0.927634	0.753702	0.927634	0.927634	0.753702	0.985611	0.941176	0.985611	1	0.927634	0.840668	0.811679
Glomerulus 5	0.771429	0.428571	0.942857	0.840668		1	0.885714	0.942857	0.657143	0.942857	0.942857	0.657143	0.885714	0.666737	0.885714	0.840668	0.942857	1	0.828571
Glomerulus 6	0.771429	0.428571	0.942857	0.840668	1		0.885714	0.942857	0.657143	0.942857	0.942857	0.657143	0.885714	0.666737	0.885714	0.840668	0.942857	1	0.828571
Glomerulus 7	0.657143	0.542857	0.942857	0.985611	0.885714	0.885714		0.942857	0.771429	0.942857	0.942857	0.771429	1	0.927634	1	0.985611	0.942857	0.885714	0.828571
Glomerulus 8	0.6	0.485714	1	0.927634	0.942857	0.942857	0.942857		0.828571	1	1	0.828571	0.942857	0.811679	0.942857	0.927634	1	0.942857	0.942857
Glomerulus 9	0.428571	0.771429	0.828571	0.753702	0.657143	0.657143	0.771429	0.828571		0.828571	0.828571	1	0.771429	0.811679	0.771429	0.753702	0.828571	0.657143	0.942857
Glomerulus 10	0.6	0.485714	1	0.927634	0.942857	0.942857	0.942857	1	0.828571		1	0.828571	0.942857	0.811679	0.942857	0.927634	1	0.942857	0.942857
Glomerulus 11	0.6	0.485714	1	0.927634	0.942857	0.942857	0.942857	1	0.828571	1		0.828571	0.942857	0.811679	0.942857	0.927634	1	0.942857	0.942857
Glomerulus 12	0.428571	0.771429	0.828571	0.753702	0.657143	0.657143	0.771429	0.828571	1	0.828571	0.828571		0.771429	0.811679	0.771429	0.753702	0.828571	0.657143	0.942857
Glomerulus 13	0.657143	0.542857	0.942857	0.985611	0.885714	0.885714	1	0.942857	0.771429	0.942857	0.942857	0.771429		0.927634	1	0.985611	0.942857	0.885714	0.828571
Glomerulus 14	0.492805	0.637748	0.811679	0.941176	0.666737	0.666737	0.927634	0.811679	0.811679	0.811679	0.811679	0.811679	0.927634		0.927634	0.941176	0.811679	0.666737	0.753702
Glomerulus 15	0.657143	0.542857	0.942857	0.985611	0.885714	0.885714	1	0.942857	0.771429	0.942857	0.942857	0.771429	1	0.927634		0.985611	0.942857	0.885714	0.828571
Glomerulus 16	0.550782	0.463817	0.927634	1	0.840668	0.840668	0.985611	0.927634	0.753702	0.927634	0.927634	0.753702	0.985611	0.941176	0.985611		0.927634	0.840668	0.811679
Glomerulus 17	0.6	0.485714	1	0.927634	0.942857	0.942857	0.942857	1	0.828571	1	1	0.828571	0.942857	0.811679	0.942857	0.927634		0.942857	0.942857
Glomerulus 18	0.771429	0.428571	0.942857	0.840668	1	1	0.885714	0.942857	0.657143	0.942857	0.942857	0.657143	0.885714	0.666737	0.885714	0.840668	0.942857		0.828571
Glomerulus 19	0.485714	0.6	0.942857	0.811679	0.828571	0.828571	0.828571	0.942857	0.942857	0.942857	0.942857	0.942857	0.828571	0.753702	0.828571	0.811679	0.942857	0.828571

## Sheet: LNI#3
LNI#3_150605E1
TABLE 1: Glomerular tuning curves - Area under the curve (AUC) given in arbitrary units (AU), of the first three seconds after stimulus onset of bleach corrected, relative fluorescence changes.
	Glomerulus 1	Glomerulus 2	Glomerulus 3	Glomerulus 4	Glomerulus 5	Glomerulus 6	Glomerulus 7	Glomerulus 8	Glomerulus 9	Glomerulus 10	Glomerulus 11	Glomerulus 12	Glomerulus 13	Glomerulus 14	Glomerulus 15	Glomerulus 16
Blank	0.006255	0.006695	0.007082	0.007445	0.006183	0.00667	0.006779	0.006617	0.006632	0.00779	0.005334	0.005041	0.005781	0.005818	0.006847	0.006144
Hexanol	0.07666	0.07013	0.07654	0.08179	0.08365	0.06605	0.07873	0.08554	0.08559	0.08746	0.1083	0.1024	0.07653	0.07508	0.08268	0.0995
Citronellal	0.09662	0.07471	0.09672	0.1131	0.1164	0.1057	0.1092	0.1109	0.1163	0.1207	0.1435	0.1341	0.1008	0.1014	0.1125	0.1131
Citral	0.01764	0.01624	0.01686	0.01945	0.02306	0.01776	0.02005	0.01909	0.02559	0.02337	0.02566	0.03218	0.02119	0.02356	0.02756	0.02688
Ionone	0.007847	0.008135	0.0127	0.007097	0.009083	0.007251	0.01055	0.007227	0.01301	0.01543	0.009336	0.008021	0.00835	0.007595	0.009443	0.01214
Geraniol	0.02308	0.02425	0.0287	0.03379	0.04274	0.03356	0.03569	0.0351	0.03527	0.03699	0.04497	0.04062	0.02883	0.03003	0.04075	0.03936
Eugenol	0.00689	0.006645	0.007098	0.006539	0.007088	0.006269	0.01275	0.01018	0.007965	0.009569	0.00753	0.009812	0.006466	0.01027	0.01046	0.01775
TABLE 2: Glomerular tuning curves - AUC, normalized to maximum in each individual glomerulus [%].
	Glomerulus 1	Glomerulus 2	Glomerulus 3	Glomerulus 4	Glomerulus 5	Glomerulus 6	Glomerulus 7	Glomerulus 8	Glomerulus 9	Glomerulus 10	Glomerulus 11	Glomerulus 12	Glomerulus 13	Glomerulus 14	Glomerulus 15	Glomerulus 16
Blank	0	0	0	0	0	0	0	0	0	0	0	0	0	0	0	0
Hexanol	77.9118	93.2662	77.4872	70.3658	70.2859	59.9616	70.2502	75.6816	71.9973	70.5606	74.5234	75.4376	74.4577	72.4634	71.7755	87.2845
Citronellal	100	100	100	100	100	100	100	100	100	100	100	100	100	100	100	100
Citral	12.5989	14.0337	10.9083	11.3625	15.3125	11.1986	12.9573	11.9607	17.2867	13.7986	14.7113	21.0284	16.2168	18.5621	19.6047	19.3874
Ionone	1.76174	2.11718	6.26743	0	2.63117	0.586691	3.68186	0.584947	5.81573	6.76645	2.89652	2.30902	2.70367	1.85914	2.4571	5.60604
Geraniol	18.6189	25.8105	24.117	24.9349	33.1682	27.1534	28.2276	27.3132	26.1134	25.8613	28.6872	27.568	24.2573	25.3311	32.089	31.0558
Eugenol	0.702706	0	0.0178496	0	0.821107	0	5.82986	3.41666	1.21549	1.57559	1.58939	3.69676	0.720908	4.65778	3.41969	10.8512
TABLE 3: Spearman correlations r between pairs of glomerular tuning curves (columns in table 2).
	Glomerulus 1	Glomerulus 2	Glomerulus 3	Glomerulus 4	Glomerulus 5	Glomerulus 6	Glomerulus 7	Glomerulus 8	Glomerulus 9	Glomerulus 10	Glomerulus 11	Glomerulus 12	Glomerulus 13	Glomerulus 14	Glomerulus 15	Glomerulus 16
Glomerulus 1		0.964286	1	0.892857	1	0.964286	0.964286	0.964286	1	1	1	0.964286	1	0.964286	0.964286	0.964286
Glomerulus 2	0.964286		0.964286	0.964286	0.964286	1	0.892857	0.892857	0.964286	0.964286	0.964286	0.892857	0.964286	0.892857	0.892857	0.892857
Glomerulus 3	1	0.964286		0.892857	1	0.964286	0.964286	0.964286	1	1	1	0.964286	1	0.964286	0.964286	0.964286
Glomerulus 4	0.892857	0.964286	0.892857		0.892857	0.964286	0.857143	0.857143	0.892857	0.892857	0.892857	0.857143	0.892857	0.857143	0.857143	0.857143
Glomerulus 5	1	0.964286	1	0.892857		0.964286	0.964286	0.964286	1	1	1	0.964286	1	0.964286	0.964286	0.964286
Glomerulus 6	0.964286	1	0.964286	0.964286	0.964286		0.892857	0.892857	0.964286	0.964286	0.964286	0.892857	0.964286	0.892857	0.892857	0.892857
Glomerulus 7	0.964286	0.892857	0.964286	0.857143	0.964286	0.892857		1	0.964286	0.964286	0.964286	1	0.964286	1	1	1
Glomerulus 8	0.964286	0.892857	0.964286	0.857143	0.964286	0.892857	1		0.964286	0.964286	0.964286	1	0.964286	1	1	1
Glomerulus 9	1	0.964286	1	0.892857	1	0.964286	0.964286	0.964286		1	1	0.964286	1	0.964286	0.964286	0.964286
Glomerulus 10	1	0.964286	1	0.892857	1	0.964286	0.964286	0.964286	1		1	0.964286	1	0.964286	0.964286	0.964286
Glomerulus 11	1	0.964286	1	0.892857	1	0.964286	0.964286	0.964286	1	1		0.964286	1	0.964286	0.964286	0.964286
Glomerulus 12	0.964286	0.892857	0.964286	0.857143	0.964286	0.892857	1	1	0.964286	0.964286	0.964286		0.964286	1	1	1
Glomerulus 13	1	0.964286	1	0.892857	1	0.964286	0.964286	0.964286	1	1	1	0.964286		0.964286	0.964286	0.964286
Glomerulus 14	0.964286	0.892857	0.964286	0.857143	0.964286	0.892857	1	1	0.964286	0.964286	0.964286	1	0.964286		1	1
Glomerulus 15	0.964286	0.892857	0.964286	0.857143	0.964286	0.892857	1	1	0.964286	0.964286	0.964286	1	0.964286	1		1
Glomerulus 16	0.964286	0.892857	0.964286	0.857143	0.964286	0.892857	1	1	0.964286	0.964286	0.964286	1	0.964286	1	1
TABLE 4: Hyperpolarized neuron. Glomerular tuning curves - AUC of the first three seconds after stimulus onset of bleach corrected, relative fluorescence changes.
	Glomerulus 1	Glomerulus 2	Glomerulus 3	Glomerulus 4	Glomerulus 5	Glomerulus 6	Glomerulus 7	Glomerulus 8	Glomerulus 9	Glomerulus 10	Glomerulus 11	Glomerulus 12	Glomerulus 13	Glomerulus 14	Glomerulus 15	Glomerulus 16
Blank	0.006255	0.006695	0.007082	0.007445	0.006183	0.00667	0.006779	0.006617	0.006632	0.00779	0.005334	0.005041	0.005781	0.005818	0.006847	0.006144
Hexanol	0.008646	0.009993	0.008976	0.009423	0.01041	0.007323	0.01072	0.00897	0.01256	0.02491	0.01181	0.009579	0.007705	0.009952	0.0104	0.01992
Citronellal	0.007008	0.009048	0.01135	0.01675	0.006846	0.008118	0.01736	0.007379	0.01922	0.02272	0.01482	0.02495	0.01506	0.01608	0.02574	0.008886
Citral	0.007278	0.009945	0.01411	0.0157	0.006891	0.00715	0.007688	0.009893	0.01529	0.02128	0.02113	0.01826	0.01479	0.01207	0.02646	0.01046
Ionone	0.01192	0.008677	0.0122	0.01309	0.009484	0.006782	0.00728	0.00695	0.01412	0.02161	0.005884	0.01466	0.009616	0.01014	0.01178	0.01023
Geraniol	0.008088	0.007605	0.007572	0.00871	0.008299	0.01053	0.01083	0.008547	0.006925	0.01326	0.01001	0.009171	0.009697	0.01153	0.009899	0.01895
Eugenol	0.008337	0.01489	0.009359	0.00763	0.007115	0.0121	0.006408	0.01662	0.008802	0.01219	0.006153	0.009042	0.006913	0.007938	0.006715	0.01605
TABLE 5: Hyperpolarized neuron. Glomerular tuning curves - AUC, normalized to maximum in glomerulus [%].
	Glomerulus 1	Glomerulus 2	Glomerulus 3	Glomerulus 4	Glomerulus 5	Glomerulus 6	Glomerulus 7	Glomerulus 8	Glomerulus 9	Glomerulus 10	Glomerulus 11	Glomerulus 12	Glomerulus 13	Glomerulus 14	Glomerulus 15	Glomerulus 16
Blank	0	0	0	0	0	0	0	0	0	0	0	0	0	0	0	0
Hexanol	42.2065	40.2441	26.9493	21.2574	100	12.0258	37.246	23.5229	47.0925	100	40.9977	22.7937	20.735	40.2845	18.1155	100
Citronellal	13.2921	28.7126	60.7285	100	15.6849	26.6667	100	7.61771	100	87.2079	60.0532	100	100	100	96.329	19.9042
Citral	18.0583	39.6583	100	88.7157	16.7495	8.83978	8.59087	32.7502	68.7798	78.7967	100	66.3971	97.0902	60.9238	100	31.3298
Ionone	100	24.1855	72.823	60.6663	78.0932	2.06262	4.7349	3.329	59.4852	80.7243	3.48189	48.3148	41.3299	42.1165	25.1517	29.6603
Geraniol	32.3566	11.1043	6.97211	13.5948	50.0591	71.0866	38.2856	19.2942	2.32761	31.9509	29.6024	20.7444	42.2028	55.6617	15.5611	92.9588
Eugenol	36.752	100	32.399	1.98818	22.0487	100	0	100	17.2386	25.7009	5.18486	20.0964	12.1996	20.6587	-0.673023	71.9077
TABLE 6: Hyperpolarized neuron. Spearman correlations r between pairs of glomerular tuning curves (columns in table 5).
	Glomerulus 1	Glomerulus 2	Glomerulus 3	Glomerulus 4	Glomerulus 5	Glomerulus 6	Glomerulus 7	Glomerulus 8	Glomerulus 9	Glomerulus 10	Glomerulus 11	Glomerulus 12	Glomerulus 13	Glomerulus 14	Glomerulus 15	Glomerulus 16
Glomerulus 1		0.428571	0.285714	0.0714286	0.928571	0.178571	-0.072075	0.285714	0.107143	0.428571	-0.107143	0.0714286	-0.107143	-0.107143	0.0360375	0.607143
Glomerulus 2	0.428571		0.428571	0.214286	0.357143	0.535714	-0.0360375	0.857143	0.392857	0.357143	0.464286	0.214286	0.0357143	0.0357143	0.14415	0.535714
Glomerulus 3	0.285714	0.428571		0.785714	0.107143	-0.0357143	0.126131	0.321429	0.857143	0.428571	0.535714	0.785714	0.607143	0.607143	0.810844	-0.0714286
Glomerulus 4	0.0714286	0.214286	0.785714		0.0714286	0	0.666694	0.0714286	0.964286	0.75	0.75	1	0.892857	0.892857	0.954994	-0.0714286
Glomerulus 5	0.928571	0.357143	0.107143	0.0714286		0.214286	0.162169	0.285714	0.0357143	0.535714	0.0357143	0.0714286	-0.0357143	-0.0357143	0.0540562	0.785714
Glomerulus 6	0.178571	0.535714	-0.0357143	0	0.214286		0.324337	0.678571	0.0357143	0.0357143	0.321429	0	0.214286	0.214286	-0.180187	0.571429
Glomerulus 7	-0.072075	-0.0360375	0.126131	0.666694	0.162169	0.324337		0	0.504525	0.666694	0.684712	0.666694	0.810844	0.810844	0.563636	0.252262
Glomerulus 8	0.285714	0.857143	0.321429	0.0714286	0.285714	0.678571	0		0.178571	0.0714286	0.535714	0.0714286	0.107143	0.107143	0.072075	0.678571
Glomerulus 9	0.107143	0.392857	0.857143	0.964286	0.0357143	0.0357143	0.504525	0.178571		0.714286	0.714286	0.964286	0.785714	0.785714	0.900937	-0.107143
Glomerulus 10	0.428571	0.357143	0.428571	0.75	0.535714	0.0357143	0.666694	0.0714286	0.714286		0.571429	0.75	0.535714	0.535714	0.666694	0.321429
Glomerulus 11	-0.107143	0.464286	0.535714	0.75	0.0357143	0.321429	0.684712	0.535714	0.714286	0.571429		0.75	0.785714	0.785714	0.756787	0.321429
Glomerulus 12	0.0714286	0.214286	0.785714	1	0.0714286	0	0.666694	0.0714286	0.964286	0.75	0.75		0.892857	0.892857	0.954994	-0.0714286
Glomerulus 13	-0.107143	0.0357143	0.607143	0.892857	-0.0357143	0.214286	0.810844	0.107143	0.785714	0.535714	0.785714	0.892857		1	0.846881	0
Glomerulus 14	-0.107143	0.0357143	0.607143	0.892857	-0.0357143	0.214286	0.810844	0.107143	0.785714	0.535714	0.785714	0.892857	1		0.846881	0
Glomerulus 15	0.0360375	0.14415	0.810844	0.954994	0.0540562	-0.180187	0.563636	0.072075	0.900937	0.666694	0.756787	0.954994	0.846881	0.846881		-0.072075
Glomerulus 16	0.607143	0.535714	-0.0714286	-0.0714286	0.785714	0.571429	0.252262	0.678571	-0.107143	0.321429	0.321429	-0.0714286	0	0	-0.072075

## Sheet: LNI#4
LNI#4_160219E1
TABLE 1: Glomerular tuning curves - Area under the curve (AUC) given in arbitrary units (AU), of the first three seconds after stimulus onset of bleach corrected, relative fluorescence changes.
	Glomerulus 1	Glomerulus 2	Glomerulus 3	Glomerulus 4	Glomerulus 5	Glomerulus 6	Glomerulus 7	Glomerulus 8	Glomerulus 9	Glomerulus 10	Glomerulus 11	Glomerulus 12
Blank	0.007535	0.007268	0.007372	0.007221	0.006336	0.006888	0.007929	0.005626	0.00623	0.006297	0.006472	0.006342
Hexanol	0.04392	0.04914	0.05895	0.05626	0.06024	0.08294	0.07629	0.07152	0.06885	0.07982	0.06833	0.05352
Citronellal	0.03821	0.04478	0.0492	0.05566	0.05208	0.07633	0.08083	0.0661	0.06441	0.06896	0.06037	0.05005
Citral	0.03354	0.03937	0.04949	0.05182	0.05173	0.07093	0.0671	0.06189	0.05756	0.06658	0.06138	0.04703
Ionone	0.04153	0.05091	0.05989	0.0572	0.05653	0.07815	0.07919	0.06983	0.06661	0.07693	0.0686	0.05734
Geraniol	0.009881	0.01083	0.01334	0.01437	0.019	0.01985	0.01879	0.01483	0.02145	0.02215	0.01889	0.01532
Eugenol	0.0235	0.02803	0.03404	0.03398	0.03264	0.04603	0.05058	0.03969	0.04158	0.03909	0.03528	0.03034
Isoamylacetate	0.04598	0.05337	0.05905	0.0662	0.06597	0.09403	0.09752	0.08293	0.08002	0.08663	0.07816	0.06558
Benzaldehyde	0.03555	0.04675	0.05492	0.05481	0.05497	0.07668	0.08027	0.06455	0.0626	0.06786	0.06709	0.05399
TABLE 2: Glomerular tuning curves - AUC, normalized to maximum in each individual glomerulus [%].
	Glomerulus 1	Glomerulus 2	Glomerulus 3	Glomerulus 4	Glomerulus 5	Glomerulus 6	Glomerulus 7	Glomerulus 8	Glomerulus 9	Glomerulus 10	Glomerulus 11	Glomerulus 12
Blank	0	0	0	0	0	0	0	0	0	0	0	0
Hexanol	94.6417	90.8247	98.2101	83.1465	90.3914	87.2736	76.3034	85.2401	84.8624	91.5228	86.2878	79.6414
Citronellal	79.7893	81.3674	79.6451	82.1292	76.7079	79.6883	81.3709	78.2288	78.8454	78.0041	75.1841	73.7837
Citral	67.6421	69.6326	80.1973	75.6184	76.121	73.4915	66.0457	72.7828	69.5623	75.0414	76.593	68.6856
Ionone	88.425	94.664	100	84.7403	84.1701	81.7769	79.5404	83.0539	81.8268	87.9253	86.6644	86.09
Geraniol	6.10222	7.72635	11.3637	12.1213	21.2362	14.8746	12.1229	11.9062	20.6261	19.7341	17.3223	15.1558
Eugenol	41.5269	45.0349	50.7788	45.3704	44.1091	44.9175	47.6063	44.065	47.9062	40.8213	40.1852	40.5112
Isoamylacetate	100	100	98.4005	100	100	100	100	100	100	100	100	100
Benzaldehyde	72.8703	85.6405	90.5366	80.688	81.5541	80.09	80.7458	76.2237	76.3925	76.6348	84.5581	80.4349
TABLE 3: Spearman correlations r between pairs of glomerular tuning curves (columns in table 2).
	Glomerulus 1	Glomerulus 2	Glomerulus 3	Glomerulus 4	Glomerulus 5	Glomerulus 6	Glomerulus 7	Glomerulus 8	Glomerulus 9	Glomerulus 10	Glomerulus 11	Glomerulus 12
Glomerulus 1		0.966667	0.9	0.983333	0.983333	0.983333	0.85	1	1	1	0.933333	0.916667
Glomerulus 2	0.966667		0.966667	0.983333	0.983333	0.983333	0.85	0.966667	0.966667	0.966667	0.983333	0.983333
Glomerulus 3	0.9	0.966667		0.933333	0.933333	0.933333	0.733333	0.9	0.9	0.9	0.983333	0.95
Glomerulus 4	0.983333	0.983333	0.933333		0.966667	0.966667	0.866667	0.983333	0.983333	0.983333	0.95	0.95
Glomerulus 5	0.983333	0.983333	0.933333	0.966667		1	0.833333	0.983333	0.983333	0.983333	0.966667	0.95
Glomerulus 6	0.983333	0.983333	0.933333	0.966667	1		0.833333	0.983333	0.983333	0.983333	0.966667	0.95
Glomerulus 7	0.85	0.85	0.733333	0.866667	0.833333	0.833333		0.85	0.85	0.85	0.783333	0.883333
Glomerulus 8	1	0.966667	0.9	0.983333	0.983333	0.983333	0.85		1	1	0.933333	0.916667
Glomerulus 9	1	0.966667	0.9	0.983333	0.983333	0.983333	0.85	1		1	0.933333	0.916667
Glomerulus 10	1	0.966667	0.9	0.983333	0.983333	0.983333	0.85	1	1		0.933333	0.916667
Glomerulus 11	0.933333	0.983333	0.983333	0.95	0.966667	0.966667	0.783333	0.933333	0.933333	0.933333		0.966667
Glomerulus 12	0.916667	0.983333	0.95	0.95	0.95	0.95	0.883333	0.916667	0.916667	0.916667	0.966667
TABLE 4: Hyperpolarized neuron. Glomerular tuning curves - AUC of the first three seconds after stimulus onset of bleach corrected, relative fluorescence changes.
	Glomerulus 1	Glomerulus 2	Glomerulus 3	Glomerulus 4	Glomerulus 5	Glomerulus 6	Glomerulus 7	Glomerulus 8	Glomerulus 9	Glomerulus 10	Glomerulus 11	Glomerulus 12
Blank	0.007535	0.007268	0.007372	0.007221	0.006336	0.006888	0.007929	0.005626	0.00623	0.006297	0.006472	0.006342
Hexanol	0.01464	0.018	0.02032	0.01854	0.02622	0.02785	0.03075	0.02569	0.02705	0.03139	0.02478	0.02329
Citronellal	0.0119	0.01361	0.0125	0.01902	0.01709	0.02189	0.02153	0.01647	0.01878	0.01565	0.01688	0.01519
Citral	0.01126	0.01091	0.01287	0.01568	0.01422	0.01906	0.01942	0.01965	0.01524	0.01675	0.01231	0.01097
Ionone	0.0119	0.01361	0.0125	0.01902	0.01709	0.02189	0.02153	0.01647	0.01878	0.01565	0.01688	0.01519
Geraniol	0.009881	0.01083	0.01334	0.01437	0.019	0.01985	0.01879	0.01483	0.02145	0.02215	0.01889	0.01532
Eugenol	0.007903	0.007868	0.007816	0.01063	0.01348	0.01097	0.01152	0.00936	0.01161	0.008268	0.01463	0.01047
Isoamylacetate	0.01618	0.01753	0.02054	0.02395	0.03184	0.03465	0.02983	0.0274	0.02598	0.02679	0.02472	0.02266
Benzaldehyde	0.007162	0.00874	0.01178	0.008468	0.0128	0.01075	0.01043	0.01182	0.01652	0.009445	0.01492	0.008314
TABLE 5: Hyperpolarized neuron. Glomerular tuning curves - AUC, normalized to maximum in glomerulus [%].
	Glomerulus 1	Glomerulus 2	Glomerulus 3	Glomerulus 4	Glomerulus 5	Glomerulus 6	Glomerulus 7	Glomerulus 8	Glomerulus 9	Glomerulus 10	Glomerulus 11	Glomerulus 12
Blank	0	0	0	0	0	0	0	0	0	0	0	0
Hexanol	82.1862	100	98.3293	67.6609	77.9642	75.5061	100	92.1466	100	100	100	100
Citronellal	50.4916	59.0943	38.9429	70.5302	42.1659	54.0379	59.5986	49.8025	60.2786	37.2733	56.8495	52.2068
Citral	43.0885	33.9359	41.7527	50.5649	30.9128	43.8441	50.3527	64.4071	43.2757	41.657	31.8877	27.3071
Ionone	50.4916	59.0943	38.9429	70.5302	42.1659	54.0379	59.5986	49.8025	60.2786	37.2733	56.8495	52.2068
Geraniol	27.1371	33.1905	45.322	42.7342	49.655	46.6897	47.5921	42.2706	73.1028	63.177	67.8283	52.9738
Eugenol	4.2568	5.59076	3.37181	20.3778	28.0113	14.7036	15.7355	17.1489	25.8405	7.85478	44.5598	24.3569
Isoamylacetate	100	95.6206	100	100	100	100	95.9686	100	94.8607	81.6682	99.6723	96.2827
Benzaldehyde	0	13.716	33.4751	7.45412	25.345	13.9111	10.9592	28.4468	49.4236	12.5453	46.1438	11.6356
TABLE 6: Hyperpolarized neuron. Spearman correlations r between pairs of glomerular tuning curves (columns in table 5).
	Glomerulus 1	Glomerulus 2	Glomerulus 3	Glomerulus 4	Glomerulus 5	Glomerulus 6	Glomerulus 7	Glomerulus 8	Glomerulus 9	Glomerulus 10	Glomerulus 11	Glomerulus 12
Glomerulus 1		0.953595	0.818573	0.945156	0.894523	0.978912	0.978912	0.919839	0.793256	0.801695	0.7595	0.877645
Glomerulus 2	0.953595		0.831933	0.882353	0.865546	0.94958	0.983193	0.932773	0.865546	0.848739	0.815126	0.882353
Glomerulus 3	0.818573	0.831933		0.714286	0.932773	0.848739	0.815126	0.89916	0.882353	0.983193	0.815126	0.915966
Glomerulus 4	0.945156	0.882353	0.714286		0.815126	0.932773	0.89916	0.848739	0.697479	0.663866	0.663866	0.764706
Glomerulus 5	0.894523	0.865546	0.932773	0.815126		0.94958	0.882353	0.831933	0.932773	0.915966	0.915966	0.983193
Glomerulus 6	0.978912	0.94958	0.848739	0.932773	0.94958		0.966387	0.882353	0.882353	0.831933	0.865546	0.932773
Glomerulus 7	0.978912	0.983193	0.815126	0.89916	0.882353	0.966387		0.915966	0.831933	0.831933	0.798319	0.89916
Glomerulus 8	0.919839	0.932773	0.89916	0.848739	0.831933	0.882353	0.915966		0.764706	0.882353	0.680672	0.815126
Glomerulus 9	0.793256	0.865546	0.882353	0.697479	0.932773	0.882353	0.831933	0.764706		0.89916	0.983193	0.94958
Glomerulus 10	0.801695	0.848739	0.983193	0.663866	0.915966	0.831933	0.831933	0.882353	0.89916		0.831933	0.932773
Glomerulus 11	0.7595	0.815126	0.815126	0.663866	0.915966	0.865546	0.798319	0.680672	0.983193	0.831933		0.932773
Glomerulus 12	0.877645	0.882353	0.915966	0.764706	0.983193	0.932773	0.89916	0.815126	0.94958	0.932773	0.932773

## Sheet: LNI#5
LNI#5_160226E1
TABLE 1: Hyperpolarized neuron. Glomerular tuning curves - AUC of first three seconds after stimulus onset of bleach corrected, relative fluorescence changes.
	Glomerulus 1	Glomerulus 2	Glomerulus 3	Glomerulus 4	Glomerulus 5	Glomerulus 6	Glomerulus 7	Glomerulus 8	Glomerulus 9	Glomerulus 10	Glomerulus 11	Glomerulus 12	Glomerulus 13	Glomerulus 14	Glomerulus 15
Blank	0.008033	0.006922	0.00737	0.008254	0.00753	0.005556	0.005559	0.007361	0.005921	0.007946	0.008507	0.008671	0.009552	0.007352	0.009307
Hexanol	0.01056	0.009257	0.01048	0.008958	0.0113	0.008693	0.00763	0.007983	0.007013	0.008112	0.00937	0.008777	0.009981	0.008777	0.009551
Citronellal	0.008303	0.005298	0.008196	0.008884	0.008039	0.006872	0.007463	0.007261	0.007707	0.00675	0.008193	0.007346	0.0108	0.00808	0.009305
Citral	0.006556	0.006739	0.00621	0.006776	0.006978	0.006478	0.006587	0.007209	0.006395	0.007885	0.008235	0.007368	0.008904	0.008265	0.00938
Ionone	0.007591	0.006397	0.00697	0.008086	0.006903	0.006546	0.005661	0.007475	0.006042	0.007774	0.006629	0.007464	0.00725	0.006085	0.008832
Geraniol	0.007033	0.006461	0.006439	0.006475	0.005167	0.00685	0.006155	0.008021	0.006781	0.009559	0.006925	0.007111	0.009159	0.007875	0.007035
Eugenol	0.007336	0.005976	0.006712	0.006614	0.008282	0.008135	0.00638	0.006299	0.008742	0.008567	0.007378	0.006705	0.009977	0.007815	0.008085
Isoamylacetate	0.01812	0.01583	0.02035	0.01726	0.0178	0.01342	0.01371	0.01664	0.01018	0.0151	0.01287	0.01181	0.01065	0.02189	0.02155
Benzaldehyde	0.01679	0.01298	0.01442	0.01394	0.01296	0.01214	0.009399	0.01017	0.007338	0.01124	0.01057	0.01169	0.01176	0.01486	0.01499
Pyrrolidine	0.00844	0.007223	0.007051	0.008936	0.007597	0.007413	0.006101	0.007704	0.007737	0.006949	0.007783	0.006909	0.01037	0.006714	0.00783
TABLE 2: Hyperpolarized neuron. Glomerular tuning curves - AUC, normalized to maximum in glomerulus [%].
	Glomerulus 1	Glomerulus 2	Glomerulus 3	Glomerulus 4	Glomerulus 5	Glomerulus 6	Glomerulus 7	Glomerulus 8	Glomerulus 9	Glomerulus 10	Glomerulus 11	Glomerulus 12	Glomerulus 13	Glomerulus 14	Glomerulus 15
Blank	0	0	0	0	0	0	0	0	0	0	0	0	0	0	0
Hexanol	25.052	26.2124	23.9599	7.81701	36.7089	39.8906	25.4079	6.70331	25.6398	2.32038	19.78	3.37687	19.4293	9.8019	1.99298
Citronellal	2.67671	0	6.36364	6.99534	4.95618	16.7345	23.3591	0	41.9347	0	0	0	56.5217	5.00757	0
Citral	0	0	0	0	0	11.7243	12.6119	0	11.1294	0	0	0	0	6.28009	0.596259
Ionone	0	0	0	0	0	12.589	1.25138	1.22858	2.84104	0	0	0	0	0	0
Geraniol	0	0	0	0	0	16.4547	7.31199	7.11284	20.1925	22.5468	0	0	0	3.59747	0
Eugenol	0	0	0	0	7.3223	32.795	10.0724	0	66.2362	8.68046	0	0	19.2482	3.18476	0
Isoamylacetate	100	100	100	100	100	100	100	100	100	100	100	100	49.7283	100	100
Benzaldehyde	86.8147	68.0063	54.3143	63.1357	52.8724	83.7233	47.1108	30.2727	33.2707	46.0442	47.284	96.1771	100	51.644	46.4184
Pyrrolidine	4.0349	3.37899	0	7.57273	0.652386	23.6139	6.64949	3.69652	42.6391	0	0	0	37.0471	0	0
TABLE 3: Hyperpolarized neuron. Spearman correlations r between pairs of glomerular tuning curves (columns in table 2).
	Glomerulus 1	Glomerulus 2	Glomerulus 3	Glomerulus 4	Glomerulus 5	Glomerulus 6	Glomerulus 7	Glomerulus 8	Glomerulus 9	Glomerulus 10	Glomerulus 11	Glomerulus 12	Glomerulus 13	Glomerulus 14	Glomerulus 15
Glomerulus 1		0.941534	0.895606	1	0.868192	0.839612	0.775027	0.712229	0.640887	0.52973	0.8574	0.8574	0.868192	0.687454	0.734856
Glomerulus 2	0.941534		0.804878	0.941534	0.817193	0.823153	0.696514	0.80615	0.559322	0.620035	0.910642	0.910642	0.706762	0.646621	0.804878
Glomerulus 3	0.895606	0.804878		0.895606	0.861366	0.78094	0.865366	0.62946	0.517109	0.620035	0.910642	0.910642	0.795107	0.840607	0.804878
Glomerulus 4	1	0.941534	0.895606		0.868192	0.839612	0.775027	0.712229	0.640887	0.52973	0.8574	0.8574	0.868192	0.687454	0.734856
Glomerulus 5	0.868192	0.817193	0.861366	0.868192		0.946081	0.840961	0.56	0.802735	0.691434	0.824621	0.824621	0.87	0.727046	0.684675
Glomerulus 6	0.839612	0.823153	0.78094	0.839612	0.946081		0.844749	0.716728	0.853881	0.770059	0.788038	0.788038	0.812291	0.718107	0.654301
Glomerulus 7	0.775027	0.696514	0.865366	0.775027	0.840961	0.844749		0.573382	0.689498	0.680632	0.788038	0.788038	0.745397	0.960584	0.823153
Glomerulus 8	0.712229	0.80615	0.62946	0.712229	0.56	0.716728	0.573382		0.42048	0.764217	0.770051	0.770051	0.45	0.570902	0.62946
Glomerulus 9	0.640887	0.559322	0.517109	0.640887	0.802735	0.853881	0.689498	0.42048		0.561398	0.440374	0.440374	0.754953	0.50827	0.348257
Glomerulus 10	0.52973	0.620035	0.620035	0.52973	0.691434	0.770059	0.680632	0.764217	0.561398		0.743921	0.743921	0.436695	0.705211	0.620035
Glomerulus 11	0.8574	0.910642	0.910642	0.8574	0.824621	0.788038	0.788038	0.770051	0.440374	0.743921		1	0.624529	0.804748	0.910642
Glomerulus 12	0.8574	0.910642	0.910642	0.8574	0.824621	0.788038	0.788038	0.770051	0.440374	0.743921	1		0.624529	0.804748	0.910642
Glomerulus 13	0.868192	0.706762	0.795107	0.868192	0.87	0.812291	0.745397	0.45	0.754953	0.436695	0.624529	0.624529		0.59042	0.485899
Glomerulus 14	0.687454	0.646621	0.840607	0.687454	0.727046	0.718107	0.960584	0.570902	0.50827	0.705211	0.804748	0.804748	0.59042		0.883715
Glomerulus 15	0.734856	0.804878	0.804878	0.734856	0.684675	0.654301	0.823153	0.62946	0.348257	0.620035	0.910642	0.910642	0.485899	0.883715	1

## Sheet: LNI#6
LNI#6_160303E1
TABLE 1: Glomerular tuning curves - Area under the curve (AUC) given in arbitrary units (AU), of the first three seconds after stimulus onset of bleach corrected, relative fluorescence changes.
	Glomerulus 1	Glomerulus 2	Glomerulus 3	Glomerulus 4	Glomerulus 5	Glomerulus 6	Glomerulus 7	Glomerulus 8	Glomerulus 9	Glomerulus 10	Glomerulus 11	Glomerulus 12	Glomerulus 13	Glomerulus 14	Glomerulus 15	Glomerulus 16	Glomerulus 17	Glomerulus 18
Blank	0.01218	0.01141	0.01008	0.01114	0.008544	0.01134	0.009043	0.006241	0.008118	0.008759	0.007898	0.01051	0.008071	0.00682	0.007454	0.008964	0.007607	0.009166
Hexanol	0.3058	0.2742	0.2669	0.2157	0.2847	0.2314	0.2804	0.2057	0.1857	0.1826	0.1687	0.156	0.1344	0.1419	0.1592	0.1462	0.1222	0.1205
Citronellal	0.2081	0.1976	0.1985	0.1644	0.2072	0.1741	0.2031	0.1483	0.1327	0.1347	0.1242	0.12	0.09847	0.1107	0.1162	0.1152	0.09493	0.08748
Citral	0.2231	0.2083	0.2053	0.164	0.2141	0.1812	0.2153	0.1588	0.1395	0.1358	0.1219	0.1202	0.09989	0.1146	0.128	0.1251	0.1001	0.09482
Ionone	0.2246	0.213	0.2129	0.1714	0.2287	0.1893	0.2149	0.1664	0.1514	0.149	0.1369	0.1251	0.1062	0.1165	0.1259	0.1187	0.09298	0.09081
Geraniol	0.1007	0.09778	0.09752	0.08831	0.1234	0.09242	0.1155	0.08569	0.06784	0.07141	0.05582	0.06641	0.05953	0.05887	0.06718	0.06668	0.05049	0.0428
Eugenol	0.1519	0.1526	0.1447	0.1179	0.1464	0.12	0.159	0.114	0.08971	0.09363	0.08239	0.08318	0.07346	0.07909	0.08627	0.084	0.06688	0.06293
Isoamylacetate	0.27	0.2418	0.2358	0.1864	0.25	0.2068	0.2484	0.1803	0.1624	0.1622	0.1484	0.1347	0.1144	0.1274	0.1424	0.1345	0.1146	0.107
Benzaldehyde	0.1267	0.1277	0.1286	0.1093	0.1423	0.1174	0.1462	0.1046	0.08796	0.08916	0.07668	0.07757	0.06855	0.07856	0.08715	0.08681	0.0669	0.06258
Pyrrolidine	0.03412	0.03487	0.03586	0.03469	0.04859	0.04294	0.05379	0.03637	0.02872	0.02482	0.02302	0.02457	0.02429	0.02375	0.02678	0.03093	0.02208	0.0209
TABLE 2: Glomerular tuning curves - AUC, normalized to maximum in each individual glomerulus [%].
	Glomerulus 1	Glomerulus 2	Glomerulus 3	Glomerulus 4	Glomerulus 5	Glomerulus 6	Glomerulus 7	Glomerulus 8	Glomerulus 9	Glomerulus 10	Glomerulus 11	Glomerulus 12	Glomerulus 13	Glomerulus 14	Glomerulus 15	Glomerulus 16	Glomerulus 17	Glomerulus 18
Blank	0	0	0	0	0	0	0	0	0	0	0	0	0	0	0	0	0	0
Hexanol	100	100	100	100	100	100	100	100	100	100	100	100	100	100	100	100	100	100
Citronellal	66.7257	70.8513	73.3666	74.9218	71.9362	73.9616	71.5135	71.2222	70.1546	72.4461	72.3262	75.256	71.5584	76.9026	71.6632	77.4112	76.2027	70.3415
Citral	71.8343	74.9229	76.0143	74.7262	74.4347	77.188	76.0095	76.4864	73.9838	73.0788	70.8959	75.3935	72.6824	79.7898	79.4393	84.625	80.7144	76.9343
Ionone	72.3452	76.7114	78.9736	78.3438	79.7216	80.8689	75.8621	80.2967	80.685	80.672	80.2241	78.7614	77.6773	81.1963	78.0554	79.9615	74.5011	73.3325
Geraniol	30.1478	32.8665	34.0472	37.7249	41.591	36.8445	39.2313	39.8322	33.6307	36.0393	29.8019	38.4219	40.7341	38.5327	39.3592	42.056	37.422	30.21
Eugenol	47.5853	53.7273	52.418	52.1901	49.9196	49.3774	55.2619	54.0256	45.9461	48.821	46.3253	49.9485	51.7609	53.5016	51.9394	54.6766	51.7248	48.2907
Isoamylacetate	87.8074	87.6708	87.8904	85.6766	87.4346	88.8212	88.2074	87.2656	86.8793	88.2651	87.3758	85.3598	84.1683	89.2656	88.9289	91.4745	93.3678	87.8743
Benzaldehyde	39.0028	44.2521	46.1491	47.9859	48.4349	48.1959	50.5449	49.3129	44.9606	46.2497	42.7743	46.0925	47.8742	53.1093	52.5193	56.7242	51.7423	47.9764
Pyrrolidine	7.47224	8.92728	10.0382	11.5125	14.5012	14.3597	16.4901	15.1054	11.6014	9.2389	9.40411	9.66389	12.8387	12.5333	12.7358	16.006	12.6299	10.5395
TABLE 3: Spearman correlations r between pairs of glomerular tuning curves (columns in table 2).
	Glomerulus 1	Glomerulus 2	Glomerulus 3	Glomerulus 4	Glomerulus 5	Glomerulus 6	Glomerulus 7	Glomerulus 8	Glomerulus 9	Glomerulus 10	Glomerulus 11	Glomerulus 12	Glomerulus 13	Glomerulus 14	Glomerulus 15	Glomerulus 16	Glomerulus 17	Glomerulus 18
Glomerulus 1		1	1	0.987879	1	1	0.987879	1	1	1	0.987879	1	1	1	0.975758	0.975758	0.951515	0.987879
Glomerulus 2	1		1	0.987879	1	1	0.987879	1	1	1	0.987879	1	1	1	0.975758	0.975758	0.951515	0.987879
Glomerulus 3	1	1		0.987879	1	1	0.987879	1	1	1	0.987879	1	1	1	0.975758	0.975758	0.951515	0.987879
Glomerulus 4	0.987879	0.987879	0.987879		0.987879	0.987879	0.963636	0.987879	0.987879	0.987879	1	0.987879	0.987879	0.987879	0.951515	0.951515	0.939394	0.963636
Glomerulus 5	1	1	1	0.987879		1	0.987879	1	1	1	0.987879	1	1	1	0.975758	0.975758	0.951515	0.987879
Glomerulus 6	1	1	1	0.987879	1		0.987879	1	1	1	0.987879	1	1	1	0.975758	0.975758	0.951515	0.987879
Glomerulus 7	0.987879	0.987879	0.987879	0.963636	0.987879	0.987879		0.987879	0.987879	0.987879	0.963636	0.987879	0.987879	0.987879	0.987879	0.987879	0.975758	1
Glomerulus 8	1	1	1	0.987879	1	1	0.987879		1	1	0.987879	1	1	1	0.975758	0.975758	0.951515	0.987879
Glomerulus 9	1	1	1	0.987879	1	1	0.987879	1		1	0.987879	1	1	1	0.975758	0.975758	0.951515	0.987879
Glomerulus 10	1	1	1	0.987879	1	1	0.987879	1	1		0.987879	1	1	1	0.975758	0.975758	0.951515	0.987879
Glomerulus 11	0.987879	0.987879	0.987879	1	0.987879	0.987879	0.963636	0.987879	0.987879	0.987879		0.987879	0.987879	0.987879	0.951515	0.951515	0.939394	0.963636
Glomerulus 12	1	1	1	0.987879	1	1	0.987879	1	1	1	0.987879		1	1	0.975758	0.975758	0.951515	0.987879
Glomerulus 13	1	1	1	0.987879	1	1	0.987879	1	1	1	0.987879	1		1	0.975758	0.975758	0.951515	0.987879
Glomerulus 14	1	1	1	0.987879	1	1	0.987879	1	1	1	0.987879	1	1		0.975758	0.975758	0.951515	0.987879
Glomerulus 15	0.975758	0.975758	0.975758	0.951515	0.975758	0.975758	0.987879	0.975758	0.975758	0.975758	0.951515	0.975758	0.975758	0.975758		1	0.987879	0.987879
Glomerulus 16	0.975758	0.975758	0.975758	0.951515	0.975758	0.975758	0.987879	0.975758	0.975758	0.975758	0.951515	0.975758	0.975758	0.975758	1		0.987879	0.987879
Glomerulus 17	0.951515	0.951515	0.951515	0.939394	0.951515	0.951515	0.975758	0.951515	0.951515	0.951515	0.939394	0.951515	0.951515	0.951515	0.987879	0.987879		0.975758
Glomerulus 18	0.987879	0.987879	0.987879	0.963636	0.987879	0.987879	1	0.987879	0.987879	0.987879	0.963636	0.987879	0.987879	0.987879	0.987879	0.987879	0.975758
TABLE 4: Hyperpolarized neuron. Glomerular tuning curves - AUC of the first three seconds after stimulus onset of bleach corrected, relative fluorescence changes.
	Glomerulus 1	Glomerulus 2	Glomerulus 3	Glomerulus 4	Glomerulus 5	Glomerulus 6	Glomerulus 7	Glomerulus 8	Glomerulus 9	Glomerulus 10	Glomerulus 11	Glomerulus 12	Glomerulus 13	Glomerulus 14	Glomerulus 15	Glomerulus 16	Glomerulus 17	Glomerulus 18
Blank	0.008039	0.006617	0.009365	0.006769	0.006853	0.01098	0.008598	0.006893	0.007951	0.007623	0.005551	0.008615	0.00921	0.008431	0.008921	0.007275	0.007265	0.007394
Hexanol	0.05617	0.05255	0.04709	0.04401	0.0604	0.03489	0.05332	0.03174	0.02777	0.03309	0.02416	0.02848	0.02931	0.02924	0.02831	0.02906	0.03003	0.02702
Citronellal	0.03704	0.03725	0.03671	0.03784	0.04175	0.02757	0.04181	0.02657	0.02027	0.02349	0.02068	0.0196	0.01995	0.01965	0.02009	0.0263	0.02115	0.01899
Citral	0.04726	0.04218	0.04168	0.03599	0.0481	0.02951	0.04634	0.03058	0.0225	0.02785	0.02369	0.0275	0.02171	0.0237	0.02828	0.02636	0.02275	0.0187
Ionone	0.03581	0.04002	0.0435	0.04887	0.06161	0.03635	0.04837	0.03937	0.03063	0.03317	0.02641	0.02782	0.02835	0.03424	0.03121	0.0337	0.02412	0.02377
Geraniol	0.1039	0.09918	0.1001	0.09047	0.1254	0.08995	0.1139	0.0849	0.06799	0.07153	0.0566	0.06302	0.05689	0.05665	0.06574	0.06454	0.04791	0.04146
Eugenol	0.1555	0.1541	0.1474	0.12	0.1483	0.1176	0.1573	0.1132	0.08987	0.09376	0.08321	0.07978	0.07105	0.077	0.08485	0.08187	0.06441	0.06162
Isoamylacetate	0.04627	0.0444	0.04143	0.04349	0.05037	0.03684	0.05234	0.03294	0.02428	0.0296	0.0239	0.02171	0.02109	0.02759	0.02835	0.02882	0.02575	0.0249
Benzaldehyde	0.01745	0.02001	0.02302	0.02163	0.02653	0.01665	0.02466	0.01607	0.01656	0.01718	0.01853	0.01584	0.01531	0.01277	0.01553	0.0162	0.00944	0.01202
Pyrrolidine	0.009614	0.007644	0.008466	0.01016	0.009766	0.01096	0.009039	0.006934	0.007214	0.009312	0.00557	0.007746	0.008032	0.006712	0.006466	0.008496	0.008305	0.008556
TABLE 5: Hyperpolarized neuron. Glomerular tuning curves - AUC, normalized to maximum in glomerulus [%].
	Glomerulus 1	Glomerulus 2	Glomerulus 3	Glomerulus 4	Glomerulus 5	Glomerulus 6	Glomerulus 7	Glomerulus 8	Glomerulus 9	Glomerulus 10	Glomerulus 11	Glomerulus 12	Glomerulus 13	Glomerulus 14	Glomerulus 15	Glomerulus 16	Glomerulus 17	Glomerulus 18
Blank	0	0	0	0	0	0	0	0	0	0	0	0	0	0	0	0	0	0
Hexanol	32.6398	31.1446	27.33	32.8894	37.8566	22.4254	30.0749	23.3729	24.1934	29.5657	23.9625	27.914	32.5032	30.3475	25.5357	29.2044	39.8373	36.193
Citronellal	19.6669	20.7705	19.8102	27.4404	24.6714	15.5599	22.3346	18.5096	15.038	18.4207	19.4813	15.436	17.3674	16.3616	14.7098	25.5044	24.2978	21.3846
Citral	26.5975	24.1133	23.4107	25.8065	29.1607	17.3795	25.381	22.2817	17.7602	23.4824	23.3572	26.5369	20.2135	22.2681	25.4962	25.5848	27.0977	20.8498
Ionone	18.8328	22.6487	24.7292	37.1815	38.712	23.7948	26.7461	30.5502	27.6847	29.6586	26.8597	26.9866	30.9508	37.6395	29.3551	35.4246	29.4951	30.1995
Geraniol	65.0077	62.7618	65.7333	73.9206	83.8102	74.0668	70.8141	73.379	73.2907	74.1923	65.7348	76.4491	77.1022	70.3219	74.8318	76.7679	71.1261	62.8223
Eugenol	100	100	100	100	100	100	100	100	100	100	100	100	100	100	100	100	100	100
Isoamylacetate	25.9262	25.6185	23.2296	32.4302	30.7656	24.2544	29.4159	24.5017	19.9331	25.514	23.6277	18.4009	19.2109	27.9412	25.5884	28.8826	32.3475	32.2834
Benzaldehyde	6.38203	9.08105	9.89242	13.1245	13.9112	5.31795	10.8015	8.63255	10.5092	11.0951	16.7128	10.1525	9.86417	6.32793	8.70418	11.9646	3.80611	8.53096
Pyrrolidine	1.06808	0.696351	0	2.99476	2.05943	0	0.296566	0.0385675	0	1.96083	0.0244659	0	0	0	0	1.63684	1.81993	2.14288
TABLE 6: Hyperpolarized neuron. Spearman correlations r between pairs of glomerular tuning curves (columns in table 5).
	Glomerulus 1	Glomerulus 2	Glomerulus 3	Glomerulus 4	Glomerulus 5	Glomerulus 6	Glomerulus 7	Glomerulus 8	Glomerulus 9	Glomerulus 10	Glomerulus 11	Glomerulus 12	Glomerulus 13	Glomerulus 14	Glomerulus 15	Glomerulus 16	Glomerulus 17	Glomerulus 18
Glomerulus 1		0.975758	0.924016	0.842424	0.866667	0.863226	0.939394	0.842424	0.863226	0.866667	0.866667	0.924016	0.924016	0.863226	0.83891	0.866667	0.939394	0.915152
Glomerulus 2	0.975758		0.948333	0.90303	0.927273	0.936175	0.987879	0.915152	0.924016	0.927273	0.927273	0.948333	0.948333	0.924016	0.911858	0.927273	0.987879	0.963636
Glomerulus 3	0.924016	0.948333		0.948333	0.972649	0.914634	0.960491	0.936175	0.97561	0.972649	0.972649	1	1	0.97561	0.939024	0.972649	0.960491	0.936175
Glomerulus 4	0.842424	0.90303	0.948333		0.987879	0.948333	0.951515	0.975758	0.984807	0.987879	0.987879	0.948333	0.948333	0.984807	0.972649	0.987879	0.951515	0.963636
Glomerulus 5	0.866667	0.927273	0.972649	0.987879		0.960491	0.963636	0.987879	0.996965	1	1	0.972649	0.972649	0.996965	0.984807	1	0.963636	0.951515
Glomerulus 6	0.863226	0.936175	0.914634	0.948333	0.960491		0.960491	0.984807	0.963415	0.960491	0.960491	0.914634	0.914634	0.963415	0.987805	0.960491	0.960491	0.948333
Glomerulus 7	0.939394	0.987879	0.960491	0.951515	0.963636	0.960491		0.951515	0.960491	0.963636	0.963636	0.960491	0.960491	0.960491	0.948333	0.963636	1	0.987879
Glomerulus 8	0.842424	0.915152	0.936175	0.975758	0.987879	0.984807	0.951515		0.984807	0.987879	0.987879	0.936175	0.936175	0.984807	0.996965	0.987879	0.951515	0.939394
Glomerulus 9	0.863226	0.924016	0.97561	0.984807	0.996965	0.963415	0.960491	0.984807		0.996965	0.996965	0.97561	0.97561	1	0.987805	0.996965	0.960491	0.948333
Glomerulus 10	0.866667	0.927273	0.972649	0.987879	1	0.960491	0.963636	0.987879	0.996965		1	0.972649	0.972649	0.996965	0.984807	1	0.963636	0.951515
Glomerulus 11	0.866667	0.927273	0.972649	0.987879	1	0.960491	0.963636	0.987879	0.996965	1		0.972649	0.972649	0.996965	0.984807	1	0.963636	0.951515
Glomerulus 12	0.924016	0.948333	1	0.948333	0.972649	0.914634	0.960491	0.936175	0.97561	0.972649	0.972649		1	0.97561	0.939024	0.972649	0.960491	0.936175
Glomerulus 13	0.924016	0.948333	1	0.948333	0.972649	0.914634	0.960491	0.936175	0.97561	0.972649	0.972649	1		0.97561	0.939024	0.972649	0.960491	0.936175
Glomerulus 14	0.863226	0.924016	0.97561	0.984807	0.996965	0.963415	0.960491	0.984807	1	0.996965	0.996965	0.97561	0.97561		0.987805	0.996965	0.960491	0.948333
Glomerulus 15	0.83891	0.911858	0.939024	0.972649	0.984807	0.987805	0.948333	0.996965	0.987805	0.984807	0.984807	0.939024	0.939024	0.987805		0.984807	0.948333	0.936175
Glomerulus 16	0.866667	0.927273	0.972649	0.987879	1	0.960491	0.963636	0.987879	0.996965	1	1	0.972649	0.972649	0.996965	0.984807		0.963636	0.951515
Glomerulus 17	0.939394	0.987879	0.960491	0.951515	0.963636	0.960491	1	0.951515	0.960491	0.963636	0.963636	0.960491	0.960491	0.960491	0.948333	0.963636		0.987879
Glomerulus 18	0.915152	0.963636	0.936175	0.963636	0.951515	0.948333	0.987879	0.939394	0.948333	0.951515	0.951515	0.936175	0.936175	0.948333	0.936175	0.951515	0.987879

## Sheet: LNI#7
LNI#7_150210E2
TABLE 1: Glomerular tuning curves - Area under the curve (AUC) given in arbitrary units (AU), of the first three seconds after stimulus onset of bleach corrected, relative fluorescence changes.
	Glomerulus 1	Glomerulus 2	Glomerulus 3	Glomerulus 4	Glomerulus 5	Glomerulus 6	Glomerulus 7	Glomerulus 8	Glomerulus 9	Glomerulus 10	Glomerulus 11	Glomerulus 12	Glomerulus 13	Glomerulus 14
Blank	0.008871	0.008851	0.01592	0.00846	0.00842	0.006546	7.392e-05	3.805e-05	7.252e-05	8.086e-05	0.0003089	5.774e-05	8.943e-05	9.428e-05
Hexanol	0.06349	0.04701	0.09775	0.07549	0.06926	0.08243	0.07104	0.08157	0.0619	0.07836	0.0601	0.0689	0.0503	0.06091
Citronellal	0.07393	0.05957	0.1197	0.1026	0.0887	0.09617	0.08677	0.104	0.08304	0.08803	0.08347	0.08896	0.06108	0.07314
Ionone	0.008871	0.008851	0.01592	0.00846	0.00842	0.006546	7.392e-05	3.805e-05	7.252e-05	8.086e-05	0.0003089	5.774e-05	8.943e-05	9.428e-05
Geraniol	0.04945	0.04086	0.08101	0.0792	0.0651	0.07085	0.06901	0.06873	0.05447	0.06365	0.05735	0.05752	0.04553	0.05014
Eugenol	0.03614	0.042	0.06103	0.05869	0.05231	0.05052	0.04933	0.05121	0.0423	0.04957	0.04427	0.05521	0.03576	0.04125
TABLE 2: Glomerular tuning curves - AUC, normalized to maximum in each individual glomerulus [%].
	Glomerulus 1	Glomerulus 2	Glomerulus 3	Glomerulus 4	Glomerulus 5	Glomerulus 6	Glomerulus 7	Glomerulus 8	Glomerulus 9	Glomerulus 10	Glomerulus 11	Glomerulus 12	Glomerulus 13	Glomerulus 14
Blank	0	0	0	0	0	0	0	0	0	0	0	0	0	0
Hexanol	83.953	75.2361	78.8495	71.2025	75.7848	84.6693	81.8562	78.4248	74.5201	89.005	71.8979	77.4359	82.3251	83.2571
Citronellal	100	100	100	100	100	100	100	100	100	100	100	100	100	100
Ionone	0	0	0	0	0	0	0	0	0	0	0	0	0	0
Geraniol	62.3726	63.1105	62.7192	75.1434	70.6029	71.7486	79.5146	66.0741	65.5648	72.2794	68.5911	64.6353	74.5043	68.5129
Eugenol	41.9143	65.3581	43.4669	53.3567	54.6712	49.065	56.8147	49.2218	50.8964	56.2702	52.8626	62.037	58.4854	56.3424
TABLE 3: Spearman correlations r between pairs of glomerular tuning curves (columns in table 2).
	Glomerulus 1	Glomerulus 2	Glomerulus 3	Glomerulus 4	Glomerulus 5	Glomerulus 6	Glomerulus 7	Glomerulus 8	Glomerulus 9	Glomerulus 10	Glomerulus 11	Glomerulus 12	Glomerulus 13	Glomerulus 14
Glomerulus 1		0.890909	1	0.927273	0.963636	1	1	1	1	1	1	0.963636	1	1
Glomerulus 2	0.890909		0.890909	0.890909	0.963636	0.890909	0.890909	0.890909	0.890909	0.890909	0.890909	0.963636	0.890909	0.890909
Glomerulus 3	1	0.890909		0.927273	0.963636	1	1	1	1	1	1	0.963636	1	1
Glomerulus 4	0.927273	0.890909	0.927273		0.963636	0.927273	0.927273	0.927273	0.927273	0.927273	0.927273	0.963636	0.927273	0.927273
Glomerulus 5	0.963636	0.963636	0.963636	0.963636		0.963636	0.963636	0.963636	0.963636	0.963636	0.963636	1	0.963636	0.963636
Glomerulus 6	1	0.890909	1	0.927273	0.963636		1	1	1	1	1	0.963636	1	1
Glomerulus 7	1	0.890909	1	0.927273	0.963636	1		1	1	1	1	0.963636	1	1
Glomerulus 8	1	0.890909	1	0.927273	0.963636	1	1		1	1	1	0.963636	1	1
Glomerulus 9	1	0.890909	1	0.927273	0.963636	1	1	1		1	1	0.963636	1	1
Glomerulus 10	1	0.890909	1	0.927273	0.963636	1	1	1	1		1	0.963636	1	1
Glomerulus 11	1	0.890909	1	0.927273	0.963636	1	1	1	1	1		0.963636	1	1
Glomerulus 12	0.963636	0.963636	0.963636	0.963636	1	0.963636	0.963636	0.963636	0.963636	0.963636	0.963636		0.963636	0.963636
Glomerulus 13	1	0.890909	1	0.927273	0.963636	1	1	1	1	1	1	0.963636		1
Glomerulus 14	1	0.890909	1	0.927273	0.963636	1	1	1	1	1	1	0.963636	1

## Sheet: LNI#8
LNI#8_151102E1
TABLE 1: Glomerular tuning curves - Area under the curve (AUC) given in arbitrary units (AU), of the first three seconds after stimulus onset of bleach corrected, relative fluorescence changes.
	Glomerulus 1	Glomerulus 2	Glomerulus 3	Glomerulus 4	Glomerulus 5	Glomerulus 6	Glomerulus 7	Glomerulus 8	Glomerulus 9	Glomerulus 10	Glomerulus 11
Blank	0.006354	0.006363	0.005757	0.006212	0.007219	0.005761	0.007367	0.007845	0.007773	0.006088	0.008047
Hexanol	0.02783	0.01972	0.01532	0.03101	0.03866	0.01821	0.03046	0.03259	0.03768	0.03433	0.02889
Citronellal	0.02148	0.01638	0.01174	0.02482	0.02925	0.01378	0.02426	0.02587	0.032	0.02696	0.03022
Citral	0.01706	0.01246	0.009852	0.0154	0.01948	0.01155	0.01798	0.0185	0.02537	0.02433	0.02112
Ionone	0.01294	0.012	0.009456	0.01494	0.0205	0.01371	0.01684	0.01481	0.01732	0.02037	0.01719
Geraniol	0.008893	0.007235	0.006922	0.008528	0.01088	0.00885	0.01118	0.008362	0.01173	0.01093	0.01007
Eugenol	0.01547	0.01212	0.007701	0.01752	0.02365	0.01068	0.01698	0.02109	0.02249	0.02022	0.01697
TABLE 2: Glomerular tuning curves - AUC, normalized to maximum in each individual glomerulus [%].
	Glomerulus 1	Glomerulus 2	Glomerulus 3	Glomerulus 4	Glomerulus 5	Glomerulus 6	Glomerulus 7	Glomerulus 8	Glomerulus 9	Glomerulus 10	Glomerulus 11
Blank	0	0	0	0	0	0	0	0	0	0	0
Hexanol	100	100	100	100	100	100	100	100	100	100	94.0017
Citronellal	70.4321	74.9944	62.564	75.0383	70.0709	64.4148	73.152	72.843	81.0078	73.9041	100
Citral	49.851	45.6465	42.8213	37.0514	38.9969	46.5017	45.9576	43.0592	58.8391	64.5917	58.9591
Ionone	30.6668	42.2026	38.6803	35.1964	42.241	63.8525	41.0211	28.1471	31.9223	50.5701	41.2348
Geraniol	11.8225	6.52841	12.1824	9.33946	11.644	24.8132	16.5115	2.08931	13.231	17.1447	9.12371
Eugenol	42.4474	43.101	20.3283	45.6005	52.2598	39.5132	41.6273	53.526	49.2092	50.0389	40.2426
TABLE 3: Spearman correlations r between pairs of glomerular tuning curves (columns in table 2).
	Glomerulus 1	Glomerulus 2	Glomerulus 3	Glomerulus 4	Glomerulus 5	Glomerulus 6	Glomerulus 7	Glomerulus 8	Glomerulus 9	Glomerulus 10	Glomerulus 11
Glomerulus 1		1	0.964286	0.964286	0.892857	0.892857	1	0.964286	1	0.964286	0.928571
Glomerulus 2	1		0.964286	0.964286	0.892857	0.892857	1	0.964286	1	0.964286	0.928571
Glomerulus 3	0.964286	0.964286		0.892857	0.857143	0.964286	0.964286	0.892857	0.964286	1	0.964286
Glomerulus 4	0.964286	0.964286	0.892857		0.964286	0.857143	0.964286	1	0.964286	0.892857	0.857143
Glomerulus 5	0.892857	0.892857	0.857143	0.964286		0.892857	0.892857	0.964286	0.892857	0.857143	0.821429
Glomerulus 6	0.892857	0.892857	0.964286	0.857143	0.892857		0.892857	0.857143	0.892857	0.964286	0.928571
Glomerulus 7	1	1	0.964286	0.964286	0.892857	0.892857		0.964286	1	0.964286	0.928571
Glomerulus 8	0.964286	0.964286	0.892857	1	0.964286	0.857143	0.964286		0.964286	0.892857	0.857143
Glomerulus 9	1	1	0.964286	0.964286	0.892857	0.892857	1	0.964286		0.964286	0.928571
Glomerulus 10	0.964286	0.964286	1	0.892857	0.857143	0.964286	0.964286	0.892857	0.964286		0.964286
Glomerulus 11	0.928571	0.928571	0.964286	0.857143	0.821429	0.928571	0.928571	0.857143	0.928571	0.964286

## Sheet: LNI#9
LNI#9_160218E1
TABLE 1: Glomerular tuning curves - Area under the curve (AUC) given in arbitrary units (AU), of the first three seconds after stimulus onset of bleach corrected, relative fluorescence changes.
	Glomerulus 1	Glomerulus 2	Glomerulus 3	Glomerulus 4	Glomerulus 5	Glomerulus 6	Glomerulus 7	Glomerulus 8	Glomerulus 9	Glomerulus 10	Glomerulus 11	Glomerulus 12	Glomerulus 13	Glomerulus 14	Glomerulus 15	Glomerulus 16	Glomerulus 17	Glomerulus 18	Glomerulus 19	Glomerulus 20	Glomerulus 21	Glomerulus 22
Blank	0.009432	0.008395	0.009025	0.006061	0.00564	0.006021	0.006248	0.007205	0.007629	0.0079	0.01068	0.01154	0.008797	0.00624	0.01184	0.009277	0.008843	0.01086	0.007757	0.009847	0.009684	0.01412
Hexanol	0.132	0.1269	0.1303	0.1236	0.1197	0.08765	0.08399	0.06397	0.06122	0.09545	0.1331	0.1472	0.1591	0.1107	0.1642	0.1368	0.1343	0.1556	0.1404	0.1541	0.1461	0.1358
Citronellal	0.09898	0.09805	0.103	0.09088	0.09282	0.06339	0.0655	0.05026	0.0484	0.08469	0.09993	0.1081	0.1194	0.08196	0.1178	0.1101	0.1038	0.1179	0.1079	0.1196	0.1079	0.1056
Citral	0.1306	0.1367	0.1437	0.1338	0.1425	0.09915	0.09972	0.07329	0.07432	0.09322	0.1363	0.1401	0.1752	0.1035	0.1656	0.1326	0.1371	0.17	0.1634	0.165	0.1577	0.1445
Ionone	0.144	0.1432	0.1474	0.1393	0.1437	0.09504	0.1056	0.07952	0.08145	0.1067	0.1514	0.1758	0.1898	0.1254	0.1942	0.144	0.1497	0.1776	0.1715	0.1731	0.1736	0.1572
Geraniol	0.08249	0.08769	0.08282	0.08231	0.08883	0.0626	0.05737	0.04241	0.0477	0.06543	0.07871	0.09386	0.1012	0.07247	0.102	0.09174	0.08858	0.1102	0.09836	0.1058	0.1	0.09183
Eugenol	0.05912	0.05596	0.05418	0.04764	0.05056	0.04056	0.04046	0.03178	0.02678	0.0332	0.03839	0.04887	0.05219	0.03903	0.0604	0.04353	0.05038	0.06001	0.05448	0.06021	0.05325	0.05092
Isoamylacetate	0.0578	0.0533	0.054	0.04897	0.05058	0.03852	0.03699	0.02759	0.03109	0.0521	0.05627	0.07085	0.06654	0.05805	0.07968	0.07207	0.06358	0.07859	0.06711	0.07638	0.06496	0.06884
Benzaldehyde	0.126	0.1197	0.1242	0.1142	0.1138	0.08368	0.08504	0.06092	0.06232	0.08595	0.1176	0.1273	0.1413	0.09873	0.1408	0.1133	0.1186	0.1376	0.1325	0.14	0.1319	0.1246
Pyrrolidine	0.008734	0.0103	0.007943	0.00837	0.008105	0.007263	0.007457	0.006786	0.007564	0.007431	0.008241	0.01253	0.007788	0.008261	0.009872	0.009196	0.01258	0.01107	0.009122	0.00795	0.007193	0.008813
TABLE 2: Glomerular tuning curves - AUC, normalized to maximum in each individual glomerulus [%].
	Glomerulus 1	Glomerulus 2	Glomerulus 3	Glomerulus 4	Glomerulus 5	Glomerulus 6	Glomerulus 7	Glomerulus 8	Glomerulus 9	Glomerulus 10	Glomerulus 11	Glomerulus 12	Glomerulus 13	Glomerulus 14	Glomerulus 15	Glomerulus 16	Glomerulus 17	Glomerulus 18	Glomerulus 19	Glomerulus 20	Glomerulus 21	Glomerulus 22
Blank	0	0	0	0	0	0	0	0	0	0	0	0	0	0	0	0	0	0	0	0	0	0
Hexanol	91.0826	87.9085	87.6423	88.2167	82.6163	87.6515	78.2491	78.4969	72.5959	88.6134	86.9955	82.5886	83.039	87.6636	83.549	94.6557	89.0669	86.8058	81.0068	88.3616	83.2231	85.0433
Citronellal	66.5448	66.5072	67.9133	63.6593	63.1465	61.6016	59.6385	59.5381	55.2295	77.7227	63.4238	58.7849	61.1056	63.5448	58.1048	74.8373	67.4138	64.1958	61.1586	67.2288	59.9185	63.9363
Citral	90.0422	95.1782	97.3261	95.8721	99.1308	100	94.0816	91.3849	90.3415	86.3563	89.2695	78.2662	91.9338	81.6213	84.3167	91.5382	91.0548	95.442	95.0532	95.0384	90.2999	91.1238
Ionone	100	100	100	100	100	95.5868	100	100	100	100	100	100	100	100	100	100	100	100	100	100	100	100
Geraniol	54.2908	58.822	53.3297	57.2272	60.2564	60.7534	51.4554	48.6828	54.2813	58.2287	48.3442	50.1157	51.0505	55.5807	49.4407	61.2093	56.6085	59.5778	55.3324	58.7756	55.099	54.3123
Eugenol	36.9241	35.2843	32.6323	31.2063	32.5366	37.0873	34.4351	33.9833	25.9425	25.6073	19.6916	22.7262	23.9736	27.5176	26.6286	25.4248	29.4888	29.477	28.5343	30.8497	26.5782	25.7199
Isoamylacetate	35.9432	33.3111	32.5023	32.2045	32.5511	34.8968	30.9425	28.1892	31.7809	44.7368	32.3977	36.1074	31.9017	43.4794	37.2011	46.609	38.86	40.6201	36.2477	40.7545	33.7222	38.2443
Benzaldehyde	86.6239	82.5674	83.234	81.1617	78.3427	83.3886	79.3059	74.2792	74.086	78.998	75.9807	70.4736	73.2049	77.6183	70.7173	77.2125	77.9209	76.0106	76.1822	79.7247	74.5601	0
Pyrrolidine	0	1.41315	0	1.73298	1.78546	1.33363	1.21689	0	0	0	0	0.602703	0	1.69604	0	0	2.65305	0.125945	0.833623	0	0	0
TABLE 3: Spearman correlations r between pairs of glomerular tuning curves (columns in table 2).
	Glomerulus 1	Glomerulus 2	Glomerulus 3	Glomerulus 4	Glomerulus 5	Glomerulus 6	Glomerulus 7	Glomerulus 8	Glomerulus 9	Glomerulus 10	Glomerulus 11	Glomerulus 12	Glomerulus 13	Glomerulus 14	Glomerulus 15	Glomerulus 16	Glomerulus 17	Glomerulus 18	Glomerulus 19	Glomerulus 20	Glomerulus 21	Glomerulus 22
Glomerulus 1		0.984807	0.987805	0.972649	0.972649	0.960491	0.960491	0.987805	0.95122	0.987805	0.97561	0.984807	0.97561	0.984807	0.97561	0.987805	0.972649	0.972649	0.972649	0.97561	0.97561	0.79388
Glomerulus 2	0.984807		0.996965	0.987879	0.987879	0.987879	0.987879	0.996965	0.972649	0.972649	0.984807	0.975758	0.984807	0.975758	0.984807	0.972649	0.987879	0.987879	0.987879	0.984807	0.984807	0.803741
Glomerulus 3	0.987805	0.996965		0.984807	0.984807	0.984807	0.984807	1	0.97561	0.97561	0.987805	0.972649	0.987805	0.972649	0.987805	0.97561	0.984807	0.984807	0.984807	0.987805	0.987805	0.806188
Glomerulus 4	0.972649	0.987879	0.984807		1	0.975758	0.975758	0.984807	0.984807	0.984807	0.996965	0.987879	0.996965	0.987879	0.996965	0.984807	1	1	1	0.996965	0.996965	0.816012
Glomerulus 5	0.972649	0.987879	0.984807	1		0.975758	0.975758	0.984807	0.984807	0.984807	0.996965	0.987879	0.996965	0.987879	0.996965	0.984807	1	1	1	0.996965	0.996965	0.816012
Glomerulus 6	0.960491	0.987879	0.984807	0.975758	0.975758		0.975758	0.984807	0.960491	0.948333	0.972649	0.951515	0.972649	0.951515	0.972649	0.948333	0.975758	0.975758	0.975758	0.972649	0.972649	0.791471
Glomerulus 7	0.960491	0.987879	0.984807	0.975758	0.975758	0.975758		0.984807	0.984807	0.948333	0.972649	0.951515	0.972649	0.951515	0.972649	0.948333	0.975758	0.975758	0.975758	0.972649	0.972649	0.730116
Glomerulus 8	0.987805	0.996965	1	0.984807	0.984807	0.984807	0.984807		0.97561	0.97561	0.987805	0.972649	0.987805	0.972649	0.987805	0.97561	0.984807	0.984807	0.984807	0.987805	0.987805	0.806188
Glomerulus 9	0.95122	0.972649	0.97561	0.984807	0.984807	0.960491	0.984807	0.97561		0.963415	0.987805	0.960491	0.987805	0.960491	0.987805	0.963415	0.984807	0.984807	0.984807	0.987805	0.987805	0.744647
Glomerulus 10	0.987805	0.972649	0.97561	0.984807	0.984807	0.948333	0.948333	0.97561	0.963415		0.987805	0.996965	0.987805	0.996965	0.987805	1	0.984807	0.984807	0.984807	0.987805	0.987805	0.806188
Glomerulus 11	0.97561	0.984807	0.987805	0.996965	0.996965	0.972649	0.972649	0.987805	0.987805	0.987805		0.984807	1	0.984807	1	0.987805	0.996965	0.996965	0.996965	1	1	0.818496
Glomerulus 12	0.984807	0.975758	0.972649	0.987879	0.987879	0.951515	0.951515	0.972649	0.960491	0.996965	0.984807		0.984807	1	0.984807	0.996965	0.987879	0.987879	0.987879	0.984807	0.984807	0.803741
Glomerulus 13	0.97561	0.984807	0.987805	0.996965	0.996965	0.972649	0.972649	0.987805	0.987805	0.987805	1	0.984807		0.984807	1	0.987805	0.996965	0.996965	0.996965	1	1	0.818496
Glomerulus 14	0.984807	0.975758	0.972649	0.987879	0.987879	0.951515	0.951515	0.972649	0.960491	0.996965	0.984807	1	0.984807		0.984807	0.996965	0.987879	0.987879	0.987879	0.984807	0.984807	0.803741
Glomerulus 15	0.97561	0.984807	0.987805	0.996965	0.996965	0.972649	0.972649	0.987805	0.987805	0.987805	1	0.984807	1	0.984807		0.987805	0.996965	0.996965	0.996965	1	1	0.818496
Glomerulus 16	0.987805	0.972649	0.97561	0.984807	0.984807	0.948333	0.948333	0.97561	0.963415	1	0.987805	0.996965	0.987805	0.996965	0.987805		0.984807	0.984807	0.984807	0.987805	0.987805	0.806188
Glomerulus 17	0.972649	0.987879	0.984807	1	1	0.975758	0.975758	0.984807	0.984807	0.984807	0.996965	0.987879	0.996965	0.987879	0.996965	0.984807		1	1	0.996965	0.996965	0.816012
Glomerulus 18	0.972649	0.987879	0.984807	1	1	0.975758	0.975758	0.984807	0.984807	0.984807	0.996965	0.987879	0.996965	0.987879	0.996965	0.984807	1		1	0.996965	0.996965	0.816012
Glomerulus 19	0.972649	0.987879	0.984807	1	1	0.975758	0.975758	0.984807	0.984807	0.984807	0.996965	0.987879	0.996965	0.987879	0.996965	0.984807	1	1		0.996965	0.996965	0.816012
Glomerulus 20	0.97561	0.984807	0.987805	0.996965	0.996965	0.972649	0.972649	0.987805	0.987805	0.987805	1	0.984807	1	0.984807	1	0.987805	0.996965	0.996965	0.996965		1	0.818496
Glomerulus 21	0.97561	0.984807	0.987805	0.996965	0.996965	0.972649	0.972649	0.987805	0.987805	0.987805	1	0.984807	1	0.984807	1	0.987805	0.996965	0.996965	0.996965	1		0.818496
Glomerulus 22	0.79388	0.803741	0.806188	0.816012	0.816012	0.791471	0.730116	0.806188	0.744647	0.806188	0.818496	0.803741	0.818496	0.803741	0.818496	0.806188	0.816012	0.816012	0.816012	0.818496	0.818496

## Sheet: LNI#10
LNI#10_160304E1
TABLE 1: Glomerular tuning curves - Area under the curve (AUC) given in arbitrary units (AU), of the first three seconds after stimulus onset of bleach corrected, relative fluorescence changes.
	Glomerulus 1	Glomerulus 2	Glomerulus 3	Glomerulus 4	Glomerulus 5	Glomerulus 6	Glomerulus 7	Glomerulus 8	Glomerulus 9	Glomerulus 10	Glomerulus 11	Glomerulus 12	Glomerulus 13	Glomerulus 14	Glomerulus 15	Glomerulus 16
Hexanol	0.06827	0.1172	0.06456	0.07902	0.06398	0.06965	0.06857	0.08869	0.08598	0.08521	0.06513	0.04866	0.04168	0.07356	0.07518	0.06963
Citronellal	0.05614	0.09349	0.0553	0.06378	0.05138	0.05572	0.05246	0.06914	0.06645	0.06535	0.04707	0.0409	0.03148	0.0529	0.04777	0.04578
Citral	0.05286	0.08927	0.05238	0.06051	0.04985	0.05258	0.05368	0.07272	0.06683	0.06618	0.05125	0.0394	0.0331	0.05422	0.05746	0.04486
Ionone	0.02271	0.03388	0.02482	0.02897	0.02612	0.03442	0.03493	0.03583	0.03507	0.03489	0.02326	0.01731	0.01609	0.02765	0.02571	0.01569
Geraniol	0.04997	0.08865	0.05148	0.05871	0.05268	0.05574	0.05534	0.07043	0.07032	0.06613	0.05246	0.03886	0.03423	0.05624	0.0613	0.0502
Eugenol	0.03645	0.07042	0.03307	0.04543	0.03432	0.03772	0.0384	0.04337	0.04092	0.04	0.03047	0.02792	0.02031	0.02784	0.03865	0.02318
Isoamylacetate	0.05832	0.09411	0.0551	0.06741	0.05719	0.06277	0.06243	0.07405	0.07242	0.07303	0.05231	0.04443	0.03775	0.06187	0.06269	0.04898
Benzaldehyde	0.03422	0.05222	0.03276	0.04187	0.03234	0.03846	0.03998	0.04719	0.04242	0.0418	0.03102	0.02635	0.02067	0.03631	0.03986	0.02944
Pyrrolidine	0.008571	0.009027	0.007908	0.009052	0.009299	0.00999	0.009601	0.008845	0.008866	0.008988	0.007526	0.009875	0.008465	0.008604	0.009345	0.006651
TABLE 2: Glomerular tuning curves - AUC, normalized to maximum in each individual glomerulus [%].
	Glomerulus 1	Glomerulus 2	Glomerulus 3	Glomerulus 4	Glomerulus 5	Glomerulus 6	Glomerulus 7	Glomerulus 8	Glomerulus 9	Glomerulus 10	Glomerulus 11	Glomerulus 12	Glomerulus 13	Glomerulus 14	Glomerulus 15	Glomerulus 16
Blank	0	0	0	0	0	0	0	0	0	0	0	0	0	0	0	0
Hexanol	100	100	100	100	100	100	100	100	100	100	100	100	100	100	100	100
Citronellal	78.374	76.3444	82.3451	75.5338	75.1773	74.5152	71.7468	72.6075	71.7284	72.3244	65.763	78.1532	66.3921	66.6882	53.297	56.9106
Citral	72.5263	72.1341	76.7779	70.2842	72.1631	68.7706	73.8864	77.6237	72.2785	73.481	73.6872	73.9302	71.7298	68.8165	69.8075	55.2484
Ionone	18.7734	16.8712	24.2326	19.65	25.4137	35.547	41.0032	25.9353	26.3028	29.8774	20.6256	11.7399	15.6837	25.9755	15.7097	2.54743
Geraniol	67.3739	71.5155	75.062	67.3944	77.7384	74.5518	76.7976	74.415	77.3306	73.4114	75.981	72.4099	75.453	72.0735	76.3503	64.8961
Eugenol	43.2697	53.3273	39.9619	46.0748	41.5682	41.5843	47.0887	36.4999	34.7713	36.9983	34.2938	41.6104	29.5881	26.2818	37.7577	16.0795
Isoamylacetate	82.2607	76.963	81.9638	81.3614	86.6233	87.4131	89.2318	79.4872	80.3706	83.0268	75.6967	88.0912	87.0511	81.1512	78.7187	62.692
Benzaldehyde	39.294	35.1691	39.3708	40.3596	37.6675	42.9382	49.8597	41.8523	36.9427	39.5067	35.3365	37.1903	30.7743	39.9387	39.8194	27.3893
Pyrrolidine	0	0	0	0	0	0	0	0	0	0	0	0	0	0	0	0
TABLE 3: Spearman correlations r between pairs of glomerular tuning curves (columns in table 2).
	Glomerulus 1	Glomerulus 2	Glomerulus 3	Glomerulus 4	Glomerulus 5	Glomerulus 6	Glomerulus 7	Glomerulus 8	Glomerulus 9	Glomerulus 10	Glomerulus 11	Glomerulus 12	Glomerulus 13	Glomerulus 14	Glomerulus 15	Glomerulus 16
Glomerulus 1		1	0.990741	1	0.972222	0.962963	0.953704	0.962963	0.953704	0.962963	0.925926	1	0.953704	0.953704	0.953704	0.935185
Glomerulus 2	1		0.990741	1	0.972222	0.962963	0.953704	0.962963	0.953704	0.962963	0.925926	1	0.953704	0.953704	0.953704	0.935185
Glomerulus 3	0.990741	0.990741		0.990741	0.953704	0.944444	0.925926	0.935185	0.925926	0.935185	0.907407	0.990741	0.925926	0.925926	0.925926	0.925926
Glomerulus 4	1	1	0.990741		0.972222	0.962963	0.953704	0.962963	0.953704	0.962963	0.925926	1	0.953704	0.953704	0.953704	0.935185
Glomerulus 5	0.972222	0.972222	0.953704	0.972222		0.990741	0.981481	0.962963	0.981481	0.962963	0.972222	0.972222	0.981481	0.981481	0.981481	0.981481
Glomerulus 6	0.962963	0.962963	0.944444	0.962963	0.990741		0.990741	0.972222	0.990741	0.972222	0.981481	0.962963	0.990741	0.990741	0.990741	0.990741
Glomerulus 7	0.953704	0.953704	0.925926	0.953704	0.981481	0.990741		0.990741	1	0.990741	0.990741	0.953704	1	1	1	0.981481
Glomerulus 8	0.962963	0.962963	0.935185	0.962963	0.962963	0.972222	0.990741		0.990741	1	0.972222	0.962963	0.990741	0.990741	0.990741	0.953704
Glomerulus 9	0.953704	0.953704	0.925926	0.953704	0.981481	0.990741	1	0.990741		0.990741	0.990741	0.953704	1	1	1	0.981481
Glomerulus 10	0.962963	0.962963	0.935185	0.962963	0.962963	0.972222	0.990741	1	0.990741		0.972222	0.962963	0.990741	0.990741	0.990741	0.953704
Glomerulus 11	0.925926	0.925926	0.907407	0.925926	0.972222	0.981481	0.990741	0.972222	0.990741	0.972222		0.925926	0.990741	0.990741	0.990741	0.990741
Glomerulus 12	1	1	0.990741	1	0.972222	0.962963	0.953704	0.962963	0.953704	0.962963	0.925926		0.953704	0.953704	0.953704	0.935185
Glomerulus 13	0.953704	0.953704	0.925926	0.953704	0.981481	0.990741	1	0.990741	1	0.990741	0.990741	0.953704		1	1	0.981481
Glomerulus 14	0.953704	0.953704	0.925926	0.953704	0.981481	0.990741	1	0.990741	1	0.990741	0.990741	0.953704	1		1	0.981481
Glomerulus 15	0.953704	0.953704	0.925926	0.953704	0.981481	0.990741	1	0.990741	1	0.990741	0.990741	0.953704	1	1		0.981481
Glomerulus 16	0.935185	0.935185	0.925926	0.935185	0.981481	0.990741	0.981481	0.953704	0.981481	0.953704	0.990741	0.935185	0.981481	0.981481	0.981481

[truncated: 32 more sheets: LNI#11, LNI#12, LNI#13, LNI#14, LNI#15, LNI#16, LNI#17, LNI#18, LNI#19, LNI#20, LNI#21, LNI#22, LNI#23, LNI#24, LNII#1, LNII#2, LNII#3, LNII#4, LNII#5, LNII#6 …]
